# Supplementary material for: Disposition of sulfur during the oxidation and subsequent leaching of retorted oil shale
Source: Royal Society of Chemistry journal article supplement (doi:10.1039/d0ra06319c), 1982-03-01
Supplement: d0ra06319c1.pdf [file d0ra06319c1.pdf]

# The mechanism for CO<sub>2</sub> reduction over Fe-modified Cu(100) surfaces with thermodynamics and kinetics: A DFT Study

Mei Qiu <sup>a,b\*</sup>, Yi Li <sup>c</sup>, Yongfan Zhang <sup>c</sup>

## Figure and Table Captions

---

<sup>a</sup> Department of Chemistry, College of Science, Jiangxi Agricultural University, Nanchang, Jiangxi, 330045, China

<sup>b</sup> State Key Laboratory of Structural Chemistry, Fujian Institute of Research on the Structure of Matter, Chinese Academy of Sciences, 350002 Fuzhou, Fujian, 350002, China

<sup>c</sup> College of Chemistry, Fuzhou University, Fuzhou, Fujian, 350116, China

To whom correspondence should be addressed. E-mail: qium@jxau.edu.cn (Mei Qiu)

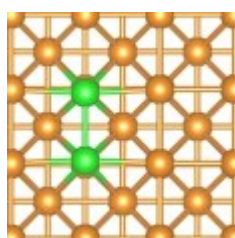

(a) M1(0 kJ/mol)

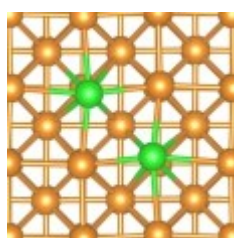

(b) M2(28.83 kJ/mol)

$x = 2$

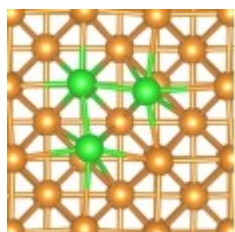

(a) M1(0 kcal/mol)

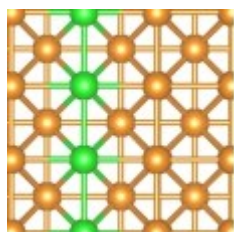

(b) M2(11.46 kJ/mol)

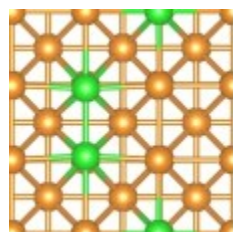

(c) M3(45.65 kJ/mol)

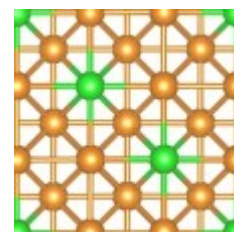

(b) M4(73.22 kJ/mol)

$x = 3$

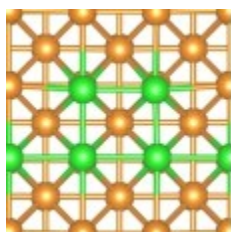

(a) M1(0 kJ/mol)

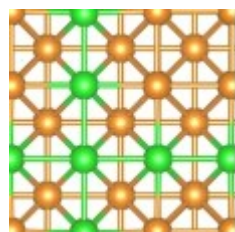

(b) M2(21.67 kJ/mol)

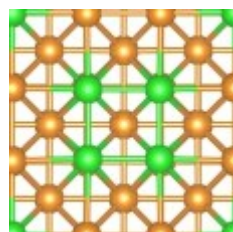

(c) M3(49.75 kJ/mol)

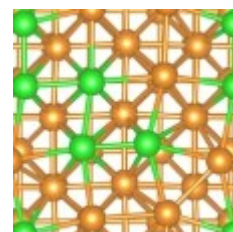

(b) M4(102.42 kJ/mol)

$x = 5$

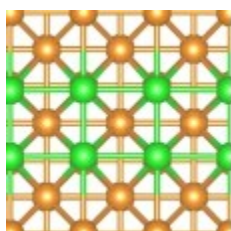

(a) M1(0 kJ/mol)

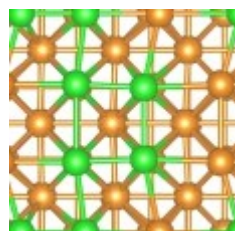

(b) M2(21.21 kJ/mol)

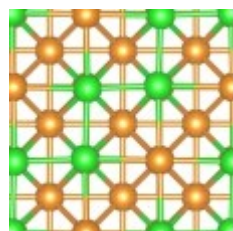

(c) M3(40.42 kJ/mol)

$x = 6$

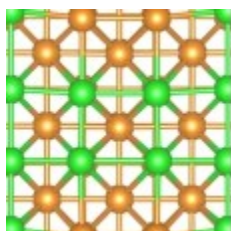

(a) M1(0 kJ/mol)

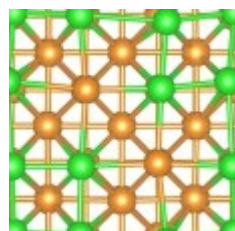

(b) M2(34.43 kJ/mol)

$x = 7$

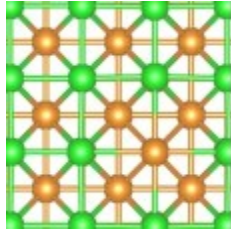

(a) M1

$x = 8$

---

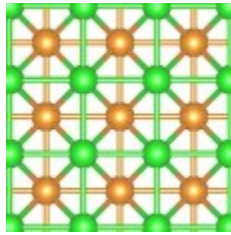

(a) M1

$x = 9$

---

**Fig. S1** Top views and the relative energies (shown in parentheses) for  $\text{Fe}_x/\text{Cu}(100)$  ( $x = 2\sim 3, 5 \sim 9$ ) surface. Orange and green spheres stand for Cu and Fe atoms, respectively.

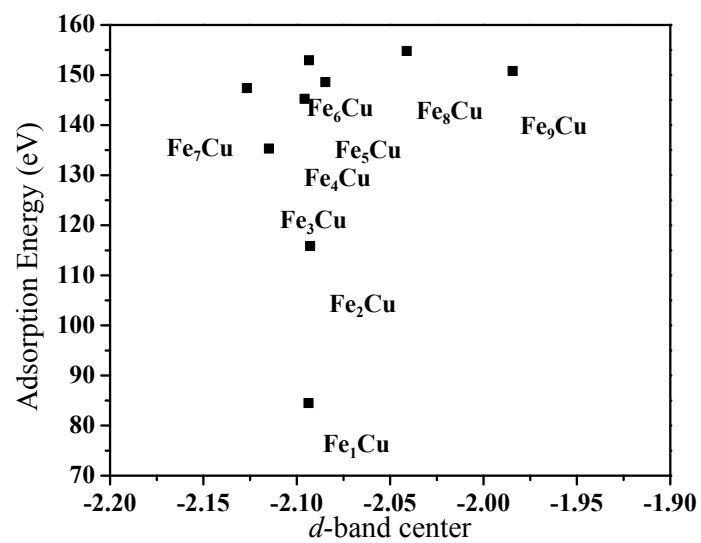

**Fig. S2** Relationship between the  $d$ -band center for  $\alpha$  orbitals of different  $\text{Fe}_x/\text{Cu}(100)$  surface and the adsorption energies of  $\text{CO}_2$  molecule.

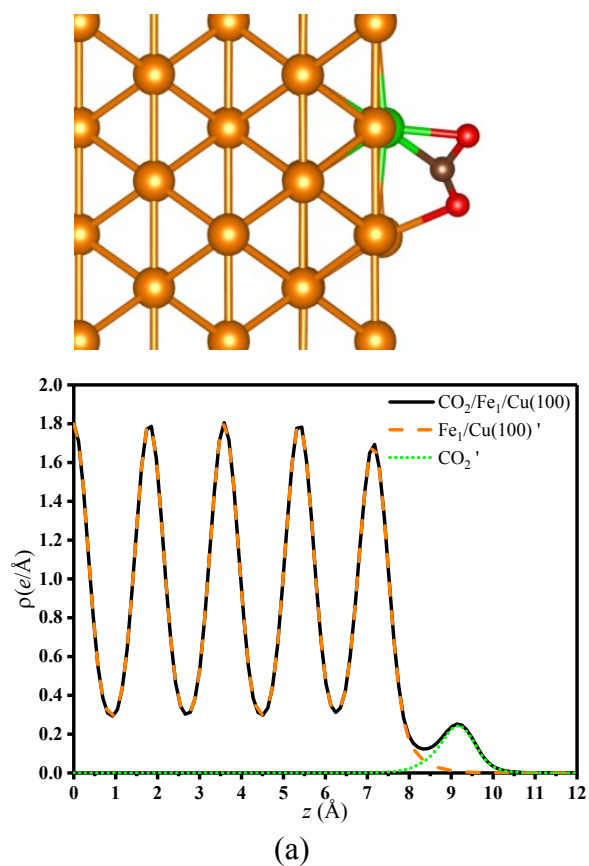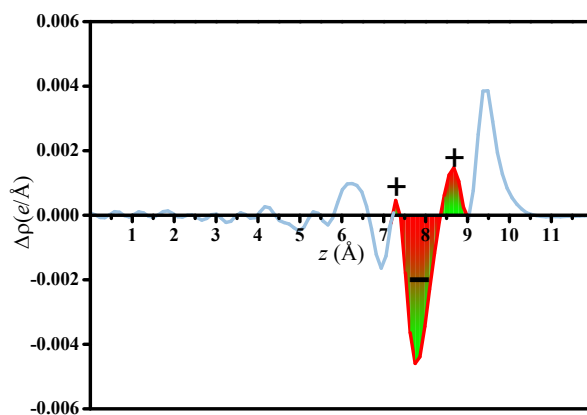

(b)

**Fig. S3** (a) Charge density curve of isolated  $\text{Fe}_1/\text{Cu}(100)'$  surface,  $\text{CO}_2'$  moiety and  $\text{CO}_2/\text{Fe}_1/\text{Cu}(100)$  surface. (b) Charge density difference curve of  $\text{CO}_2/\text{Fe}_1/\text{Cu}(100)$  surface:  $\Delta\rho(z) = \rho_{\text{CO}_2/\text{Fe}_1/\text{Cu}(100)}(z) - \rho_{\text{CO}_2'}(z) - \rho_{\text{Fe}_1/\text{Cu}(100)'}$ .  $\text{Fe}_1/\text{Cu}(100)$  surface denotes from the  $\text{CO}_2/\text{Fe}_1/\text{Cu}(100)$  system and  $\text{CO}_2'$  is the bent  $\text{CO}_2$  moiety of the same  $\text{CO}_2/\text{Fe}_1/\text{Cu}(100)$  system.

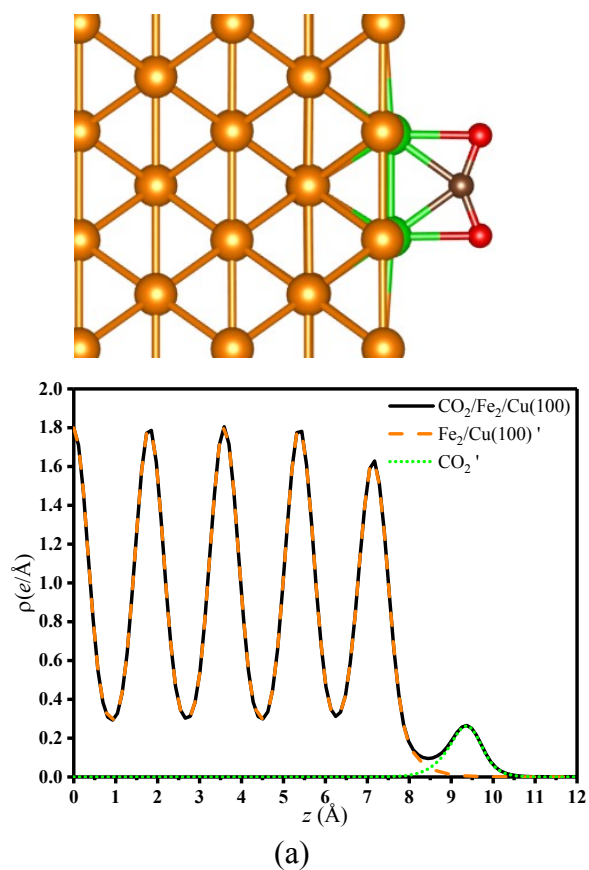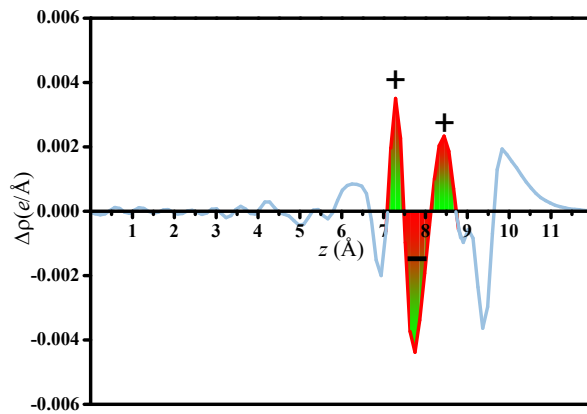

**Fig. S4** (a) Charge density curve of isolated  $\text{Fe}_2/\text{Cu}(100)'$  surface,  $\text{CO}_2'$  moiety and  $\text{CO}_2/\text{Fe}_2/\text{Cu}(100)$  surface. (b) Charge density difference curve of  $\text{CO}_2/\text{Fe}_2/\text{Cu}(100)$  surface:  $\Delta\rho(z) = \rho_{\text{CO}_2/\text{Fe}_2/\text{Cu}(100)}(z) - \rho_{\text{CO}_2'}(z) - \rho_{\text{Fe}_2/\text{Cu}(100)'}$ .  $\text{Fe}_2/\text{Cu}(100)$  surface denotes from the  $\text{CO}_2/\text{Fe}_2/\text{Cu}(100)$  system and  $\text{CO}_2'$  is the bent  $\text{CO}_2$  moiety of the same  $\text{CO}_2/\text{Fe}_2/\text{Cu}(100)$  system.

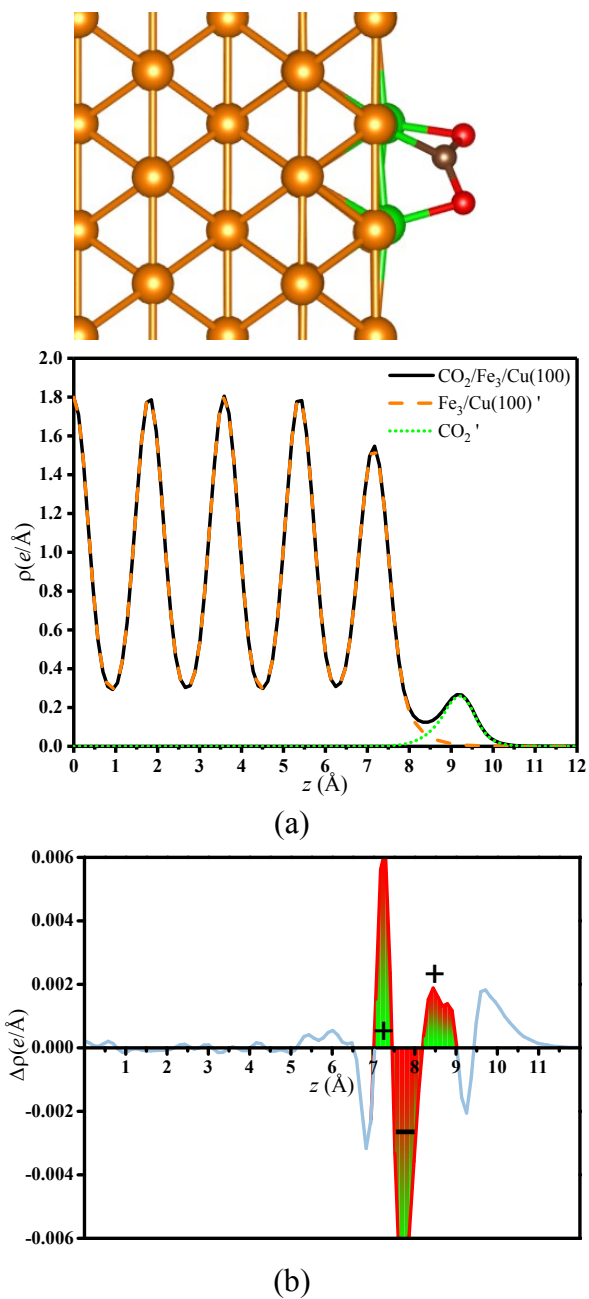

**Fig. S5** (a) Charge density curve of isolated Fe<sub>3</sub>/Cu(100)' surface, CO<sub>2</sub>' moiety and CO<sub>2</sub>/Fe<sub>3</sub>/Cu(100) surface. (b) Charge density difference curve of CO<sub>2</sub>/Fe<sub>3</sub>/Cu(100) surface:  $\Delta\rho(z) = \rho_{CO_2/Fe_3/Cu(100)}(z) - \rho_{CO_2'}(z) - \rho_{Fe_3/Cu(100)'}(z)$ . Fe<sub>3</sub>/Cu(100) surface denotes from the CO<sub>2</sub>/Fe<sub>3</sub>/Cu(100) system and CO<sub>2</sub>' is the bent CO<sub>2</sub> moiety of the same CO<sub>2</sub>/Fe<sub>3</sub>/Cu(100) system.

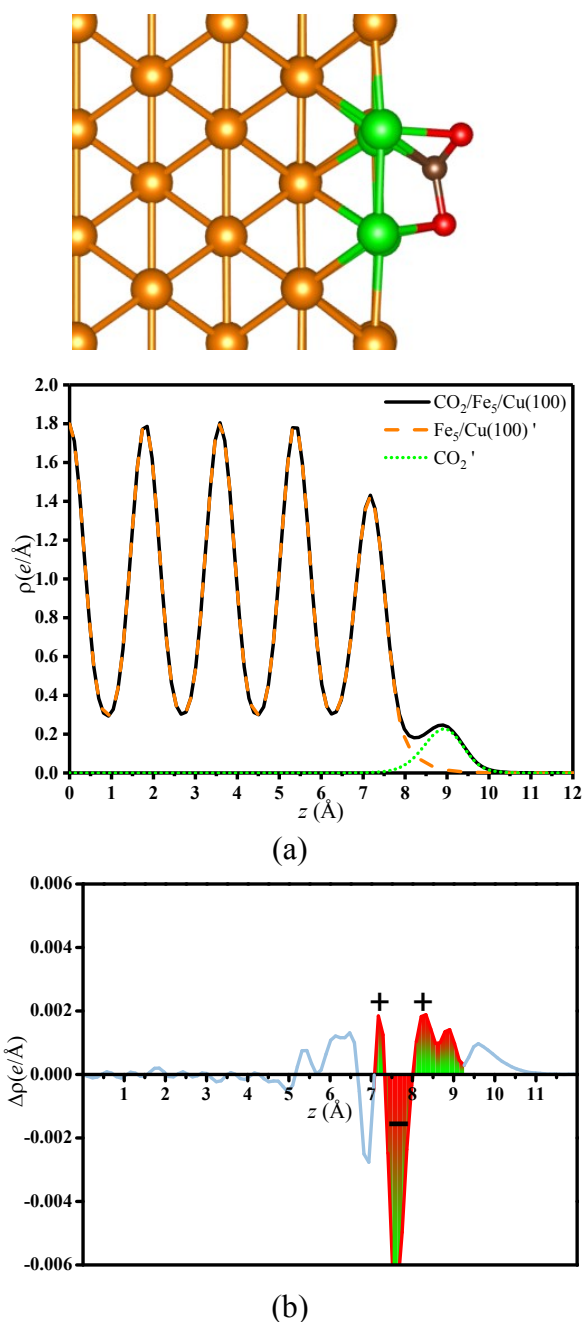

**Fig. S6** (a) Charge density curve of isolated Fe<sub>5</sub>/Cu(100) surface, CO<sub>2</sub> moiety and CO<sub>2</sub>/Fe<sub>5</sub>/Cu(100) surface. (b) Charge density difference curve of CO<sub>2</sub>/Fe<sub>5</sub>/Cu(100) surface:  $\Delta\rho(z) = \rho_{\text{CO}_2/\text{Fe}_5/\text{Cu}(100)}(z) - \rho_{\text{CO}_2'}(z) - \rho_{\text{Fe}_5/\text{Cu}(100)'}(z)$ . Fe<sub>5</sub>/Cu(100) surface denotes from the CO<sub>2</sub>/Fe<sub>5</sub>/Cu(100) system and CO<sub>2</sub>' is the bent CO<sub>2</sub> moiety of the same CO<sub>2</sub>/Fe<sub>5</sub>/Cu(100) system.



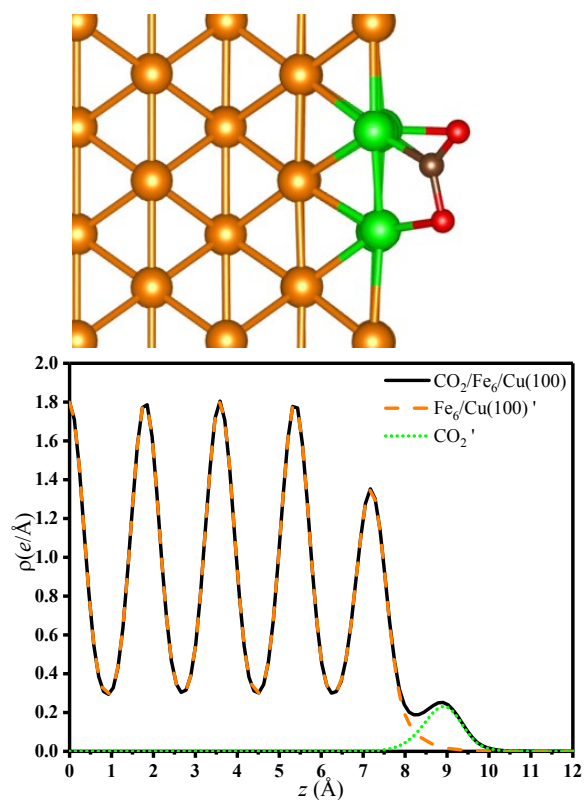

(a)

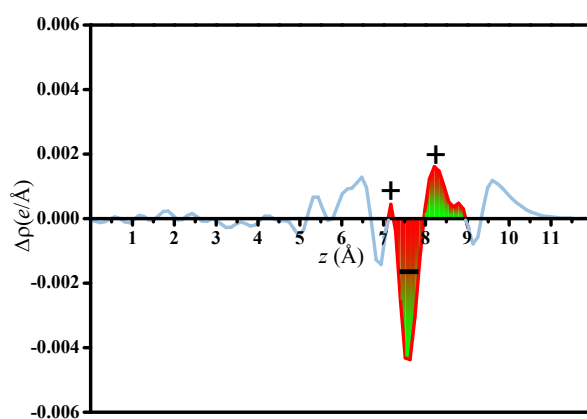

(b)

**Fig. S7** (a) Charge density curve of isolated  $\text{Fe}_6/\text{Cu}(100)'$  surface,  $\text{CO}_2'$  moiety and  $\text{CO}_2/\text{Fe}_6/\text{Cu}(100)$  surface. (b) Charge density difference curve of  $\text{CO}_2/\text{Fe}_6/\text{Cu}(100)$  surface:  $\Delta\rho(z) = \rho_{\text{CO}_2/\text{Fe}_6/\text{Cu}(100)}(z) - \rho_{\text{CO}_2'}(z) - \rho_{\text{Fe}_6/\text{Cu}(100)'}$ .  $\text{Fe}_6/\text{Cu}(100)$  surface denotes from the  $\text{CO}_2/\text{Fe}_6/\text{Cu}(100)$  system and  $\text{CO}_2'$  is the bent  $\text{CO}_2$  moiety of the same  $\text{CO}_2/\text{Fe}_6/\text{Cu}(100)$  system.

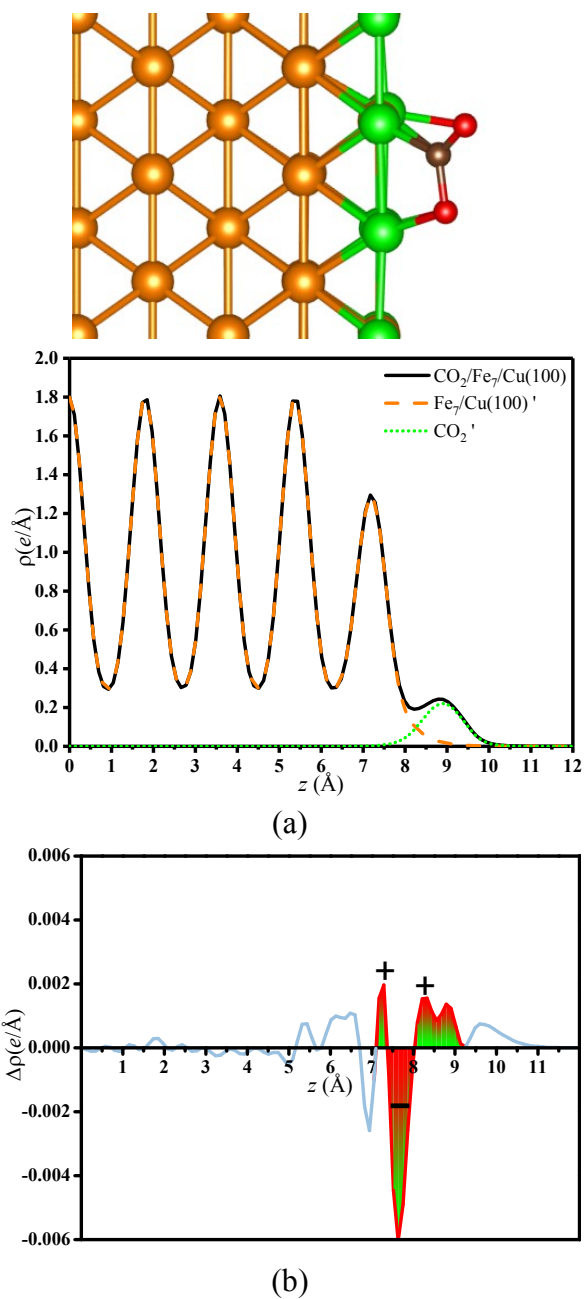

**Fig. S8** (a) Charge density curve of isolated Fe<sub>7</sub>/Cu(100)' surface, CO<sub>2</sub>' moiety and CO<sub>2</sub>/Fe<sub>7</sub>/Cu(100) surface. (b) Charge density difference curve of CO<sub>2</sub>/Fe<sub>7</sub>/Cu(100) surface:  $\Delta\rho(z) = \rho_{\text{CO}_2/\text{Fe}_7/\text{Cu}(100)}(z) - \rho_{\text{CO}_2'}(z) - \rho_{\text{Fe}_7/\text{Cu}(100)'}$ . Fe<sub>7</sub>/Cu(100) surface denotes from the CO<sub>2</sub>/Fe<sub>7</sub>/Cu(100) system and CO<sub>2</sub>' is the bent CO<sub>2</sub> moiety of the same CO<sub>2</sub>/Fe<sub>7</sub>/Cu(100) system.

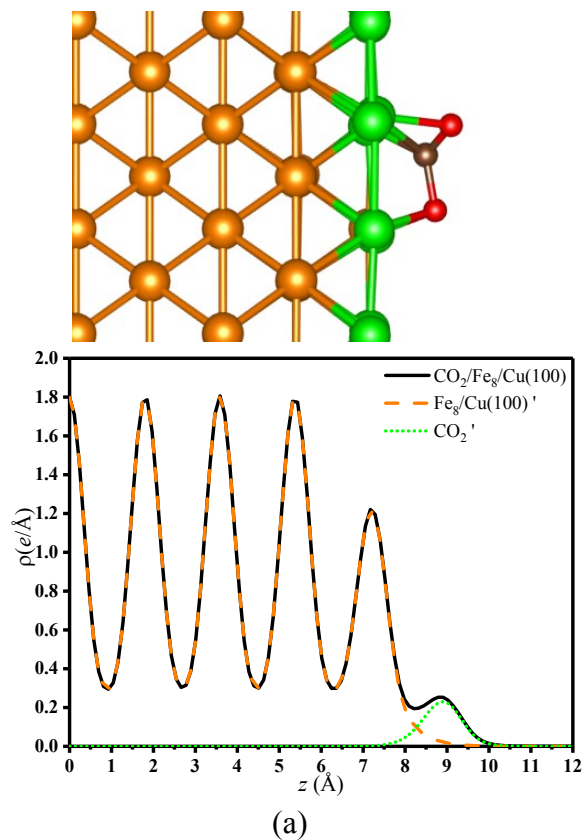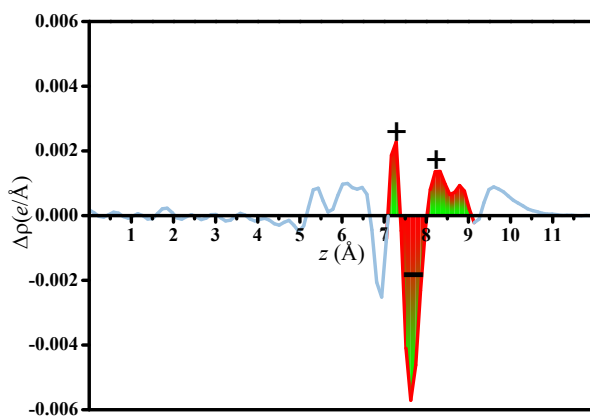

(a)

**Fig. S9** (a) Charge density curve of isolated  $\text{Fe}_8/\text{Cu}(100)'$  surface,  $\text{CO}_2'$  moiety and  $\text{CO}_2/\text{Fe}_8/\text{Cu}(100)$  surface. (b) Charge density difference curve of  $\text{CO}_2/\text{Fe}_8/\text{Cu}(100)$  surface:  $\Delta\rho(z) = \rho_{\text{CO}_2/\text{Fe}_8/\text{Cu}(100)}(z) - \rho_{\text{CO}_2'}(z) - \rho_{\text{Fe}_8/\text{Cu}(100)'}$ .  $\text{Fe}_8/\text{Cu}(100)$  surface denotes from the  $\text{CO}_2/\text{Fe}_8/\text{Cu}(100)$  system and  $\text{CO}_2'$  is the bent  $\text{CO}_2$  moiety of the same  $\text{CO}_2/\text{Fe}_8/\text{Cu}(100)$  system.

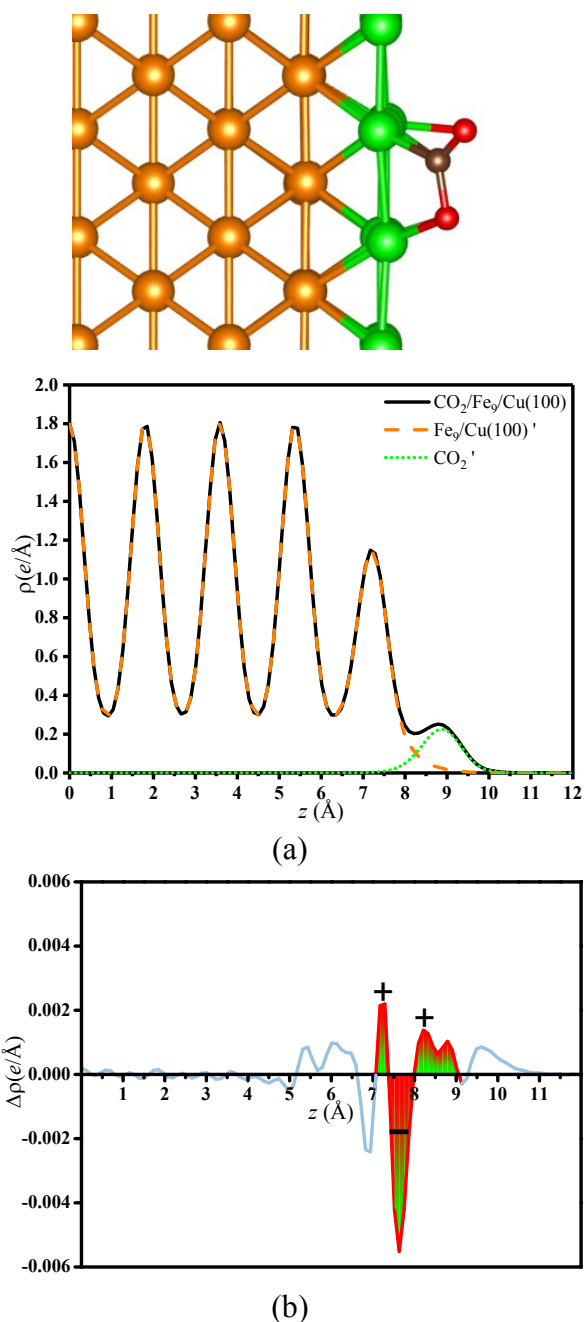

**Fig. S10** (a) Charge density curve of isolated Fe<sub>9</sub>/Cu(100)' surface, CO<sub>2</sub>' moiety and CO<sub>2</sub>/Fe<sub>9</sub>/Cu(100) surface. (b) Charge density difference curve of CO<sub>2</sub>/Fe<sub>9</sub>/Cu(100) surface:  $\Delta\rho(z) = \rho_{\text{CO}_2/\text{Fe}_9/\text{Cu}(100)}(z) - \rho_{\text{CO}_2'}(z) - \rho_{\text{Fe}_9/\text{Cu}(100)'}(z)$ . Fe<sub>9</sub>/Cu(100) surface denotes from the CO<sub>2</sub>/Fe<sub>9</sub>/Cu(100) system and CO<sub>2</sub>' is the bent CO<sub>2</sub> moiety of the same CO<sub>2</sub>/Fe<sub>9</sub>/Cu(100) system.

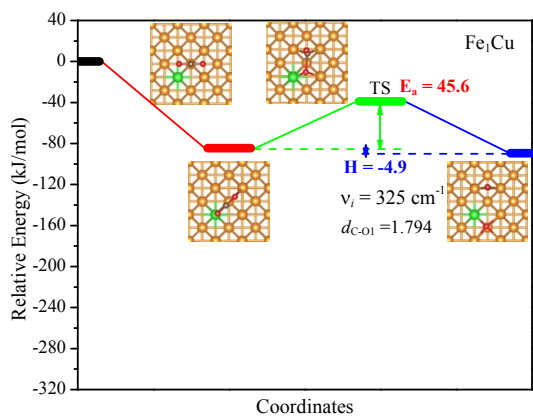

(a)

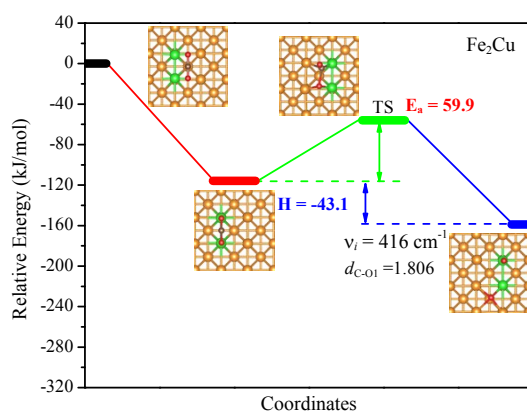

(b)

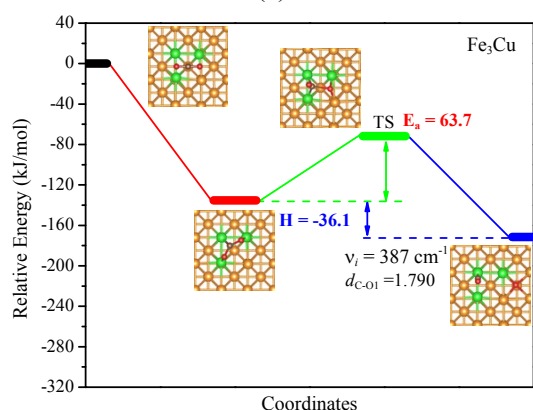

(c)

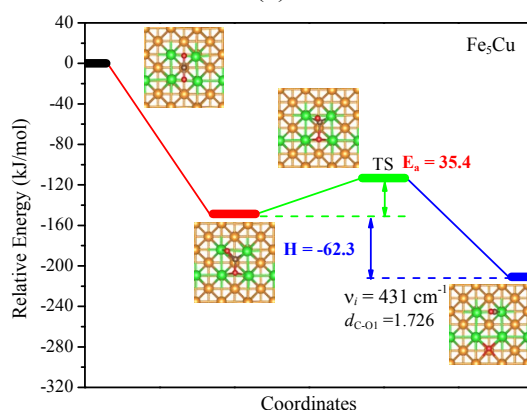

(d)

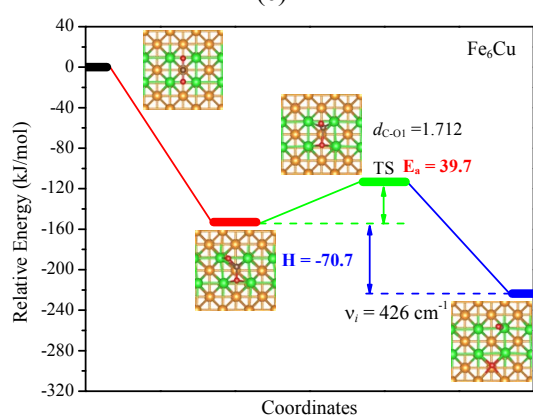

(e)

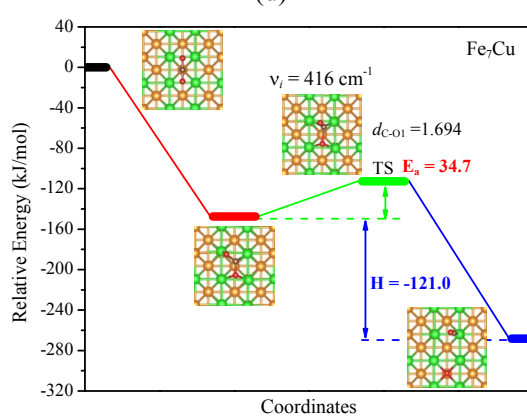

(f)

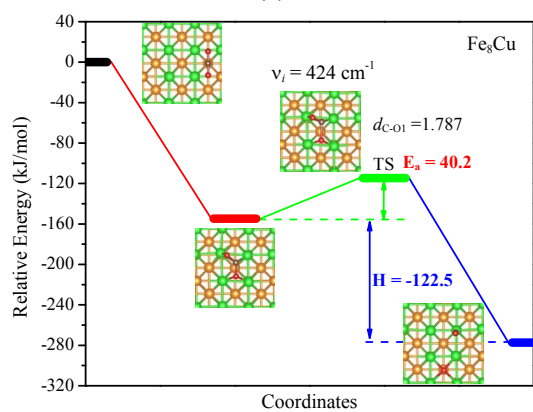

(g)

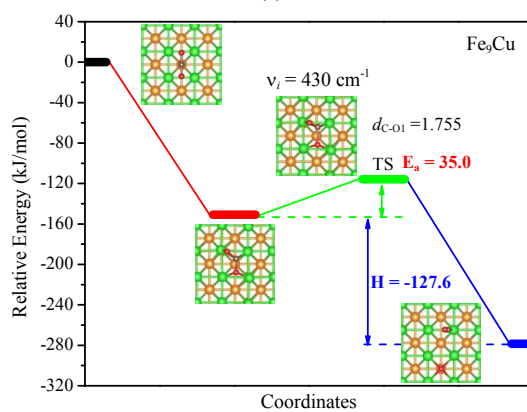

(h)

**Fig. S11** Calculated reaction paths of CO<sub>2</sub> dissociation on the (a) Fe<sub>1</sub>/Cu(100), (b) Fe<sub>2</sub>/Cu(100), (c) Fe<sub>3</sub>/Cu(100), (d) Fe<sub>5</sub>/Cu(100), (e) Fe<sub>6</sub>/Cu(100), (f) Fe<sub>7</sub>/Cu(100), (g) Fe<sub>8</sub>/Cu(100) and (h) Fe<sub>9</sub>/Cu(100) surfaces. The zero of energy is set to the total energy of the isolated surface and CO<sub>2</sub> molecule in the gas phase.

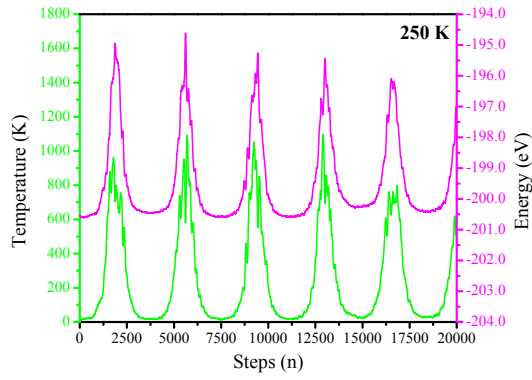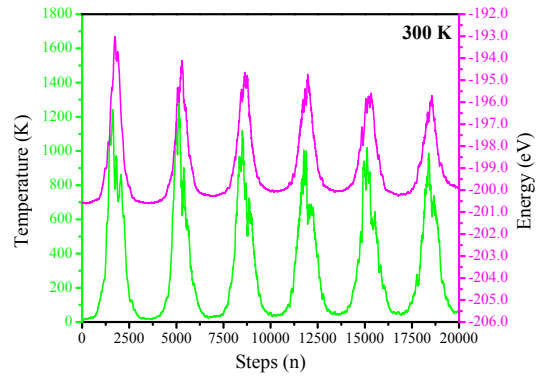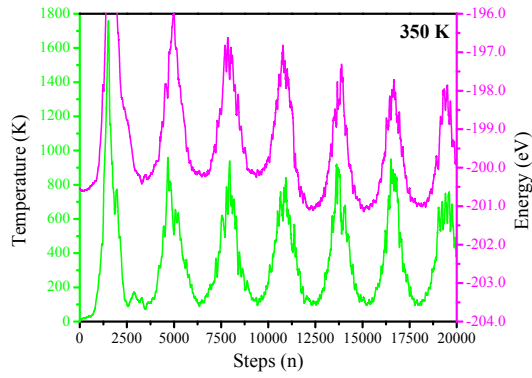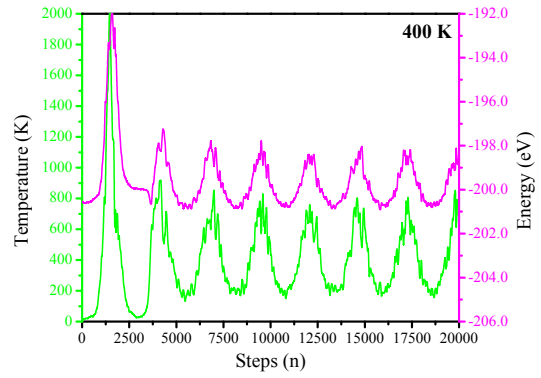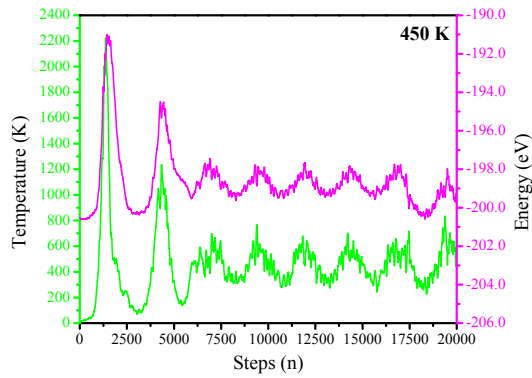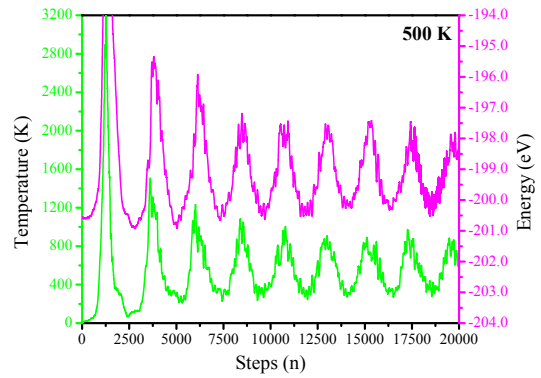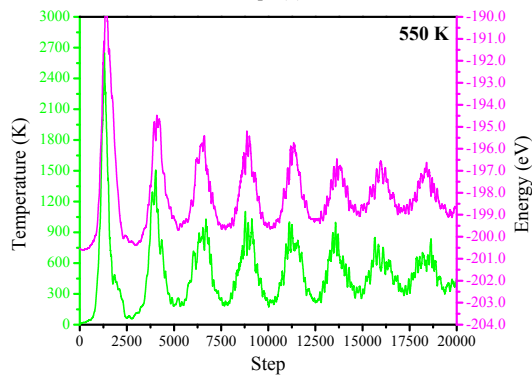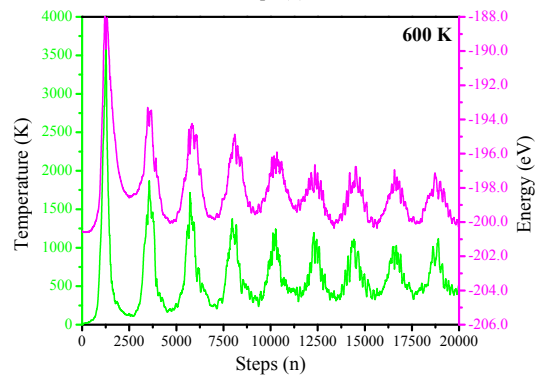

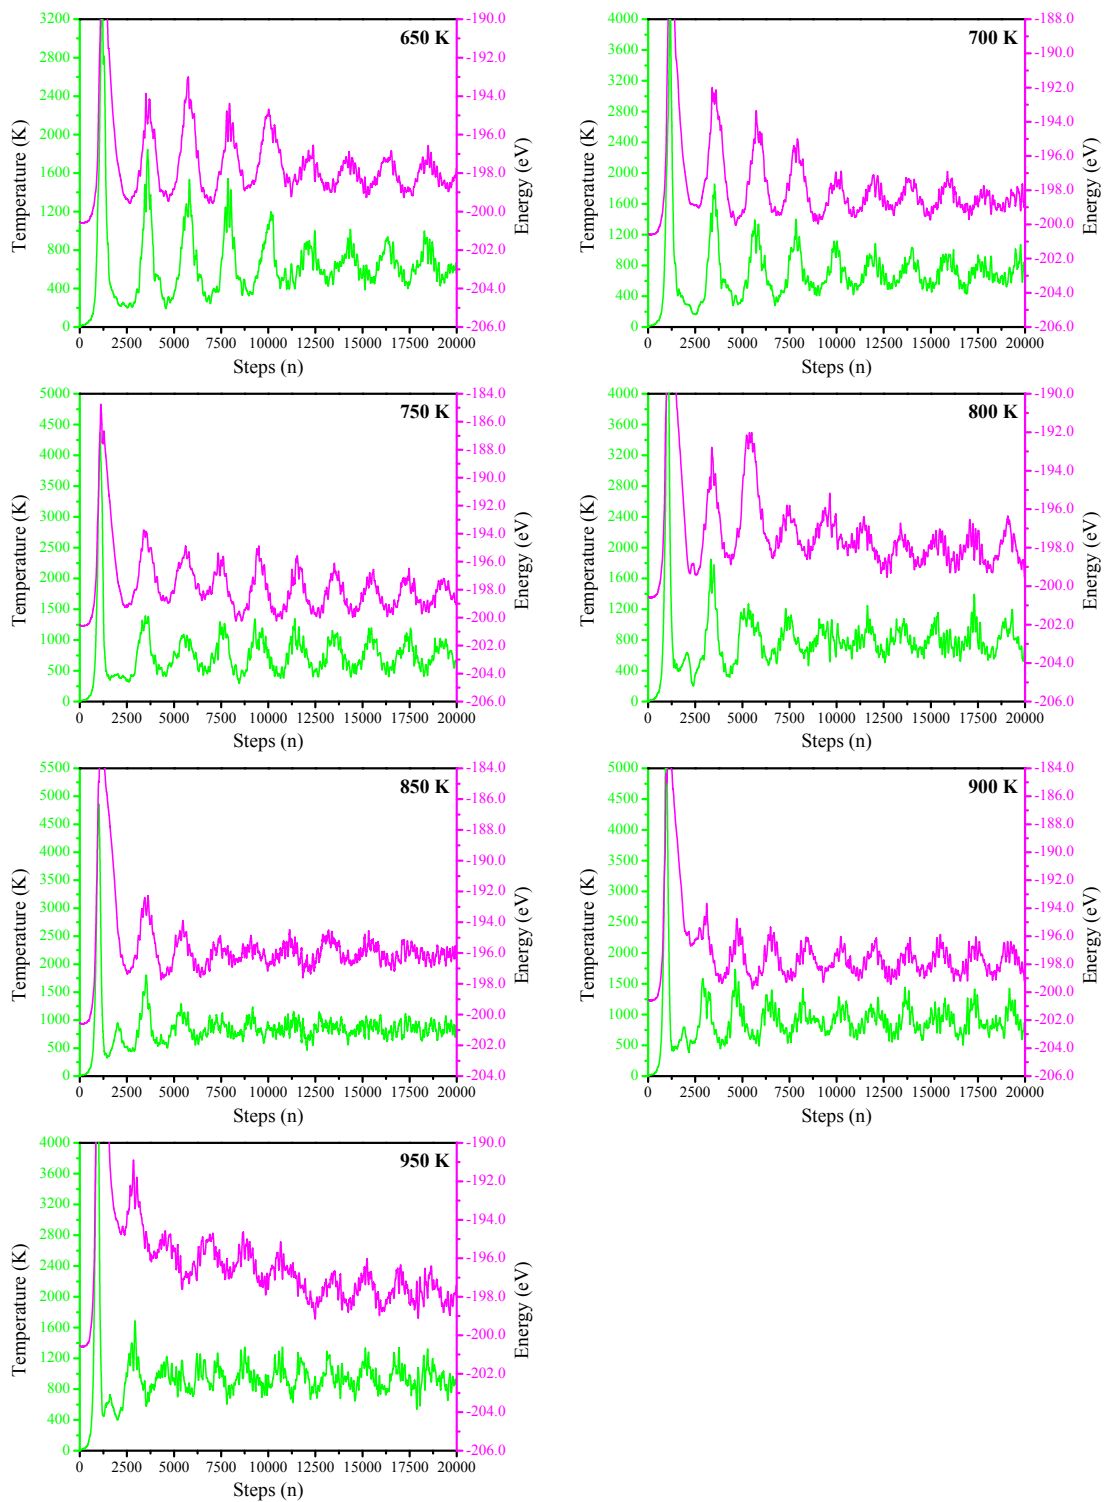

**Fig. S12** the relationship between the temperature (K) and energy of the system per  $fs$  as the function of time steps at the simulated temperature from 250 to 950 K.



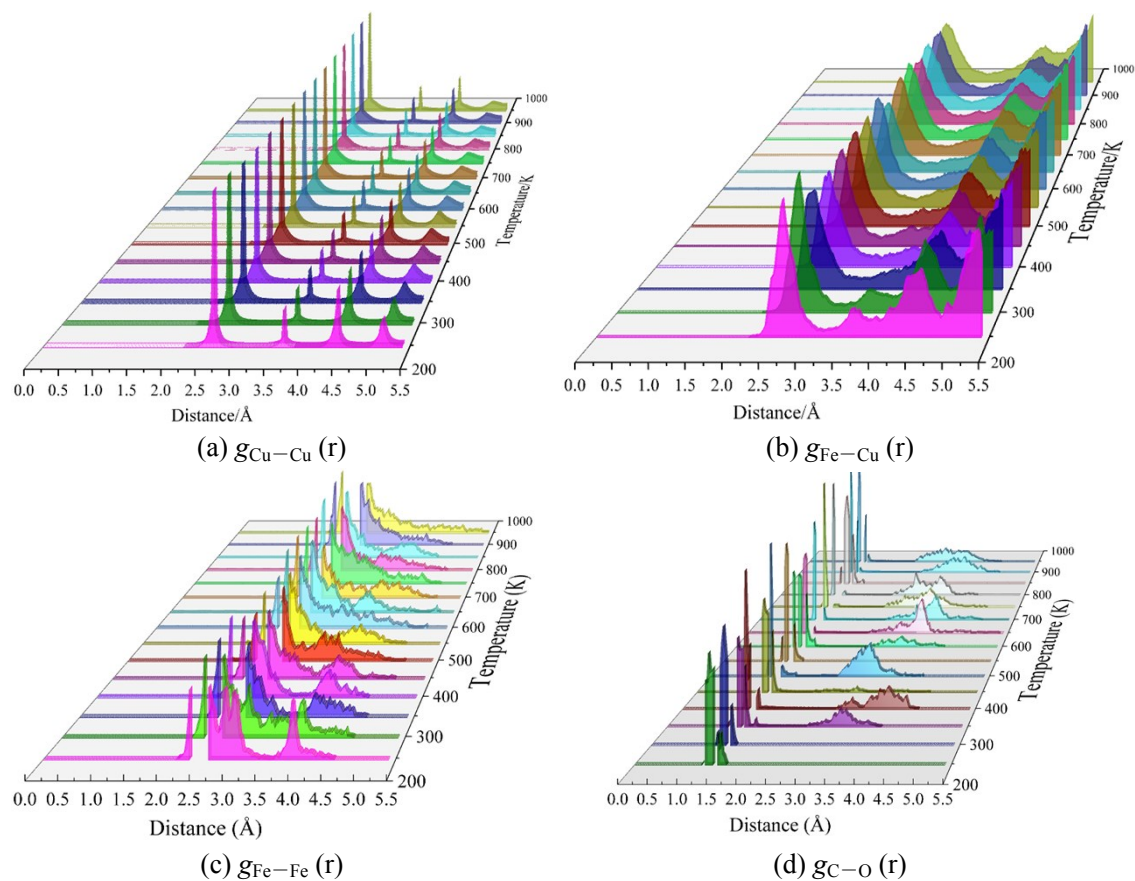

**Fig. S13** The radial distribution function ( $g(r)$ ) for (a) Cu—Cu, (b) Fe—Cu, (c) Fe—Fe and (d) C—O bonds in  $\text{CO}_2/\text{Fe}_4/\text{Cu}(100)$  surface.

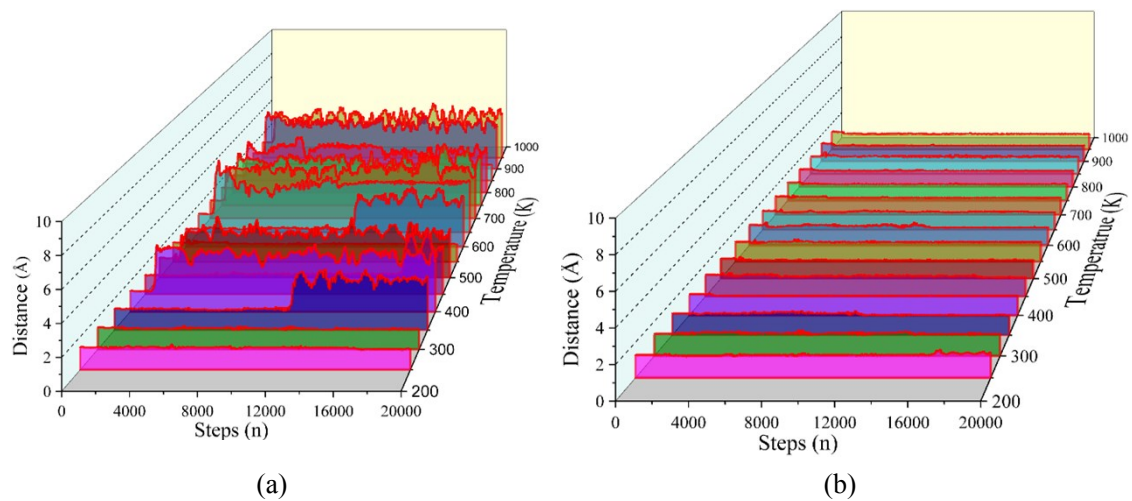

**Fig. S14** The distance of (a) C—O1 and (b) C—O2 bonds as the function of time steps at the simulated temperature from 250 to 950 K.

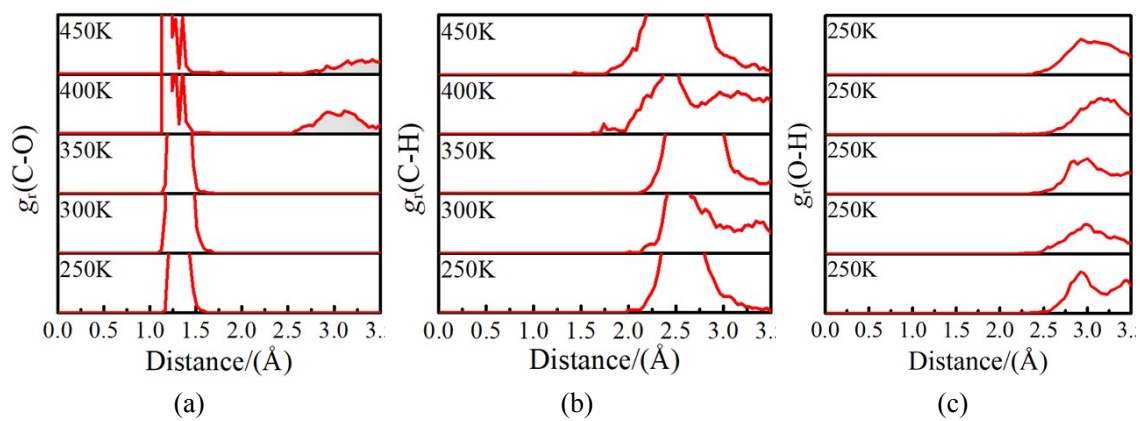

**Fig. S15** The radial distribution function ( $g(r)$ ) of the (a) C—O, (b) C—H, (c) O—H.

**Table S1** Vibration frequencies (units:  $\text{cm}^{-1}$ ) for the  $\text{CO}_2$  moiety on the  $\text{Fe}_x/\text{Cu}(100)$  surface.

| <b>Model</b> | <b><math>\text{Fe}_1/\text{Cu}</math></b> | <b><math>\text{Fe}_2/\text{Cu}</math></b> | <b><math>\text{Fe}_3/\text{Cu}</math></b> | <b><math>\text{Fe}_4/\text{Cu}</math></b> | <b><math>\text{Fe}_5/\text{Cu}</math></b> | <b><math>\text{Fe}_6/\text{Cu}</math></b> | <b><math>\text{Fe}_7/\text{Cu}</math></b> | <b><math>\text{Fe}_8/\text{Cu}</math></b> | <b><math>\text{Fe}_9/\text{Cu}</math></b> |
|--------------|-------------------------------------------|-------------------------------------------|-------------------------------------------|-------------------------------------------|-------------------------------------------|-------------------------------------------|-------------------------------------------|-------------------------------------------|-------------------------------------------|
| 1            | 1610                                      | 1707                                      | 1374                                      | 1305                                      | 1296                                      | 1283                                      | 1279                                      | 1258                                      | 1261                                      |
| 2            | 1122                                      | 1152                                      | 1117                                      | 1017                                      | 1019                                      | 1025                                      | 989                                       | 993                                       | 979                                       |
| 3            | 680                                       | 678                                       | 707                                       | 669                                       | 666                                       | 664                                       | 681                                       | 681                                       | 679                                       |
| 4            | 359                                       | 455                                       | 455                                       | 413                                       | 398                                       | 396                                       | 427                                       | 430                                       | 430                                       |
| 5            | 348                                       | 358                                       | 404                                       | 396                                       | 392                                       | 386                                       | 406                                       | 415                                       | 410                                       |
| 6            | 293                                       | 237                                       | 360                                       | 306                                       | 311                                       | 328                                       | 338                                       | 363                                       | 349                                       |
| 7            | 234                                       | 233                                       | 260                                       | 285                                       | 277                                       | 268                                       | 285                                       | 293                                       | 286                                       |
| 8            | 233                                       | 231                                       | 237                                       | 244                                       | 243                                       | 247                                       | 249                                       | 253                                       | 255                                       |
| 9            | 231                                       | 230                                       | 236                                       | 239                                       | 236                                       | 242                                       | 246                                       | 246                                       | 245                                       |

**Table S2** The entropy and enthalpy corrections for energy barrier ( $E_a^+$  and  $E_a^-$ ) reaction energy ( $H^+$  and  $H^-$ ) for  $\text{CO}_2$  decomposition on  $\text{Fe}_1/\text{Cu}(100)$  surface at temperature from 250 to 1000 K. (Energy: kJ/mol Temperature: K)

| Temperatur<br>e | $E_a^+$     |                      | $H^+$       |                      | $E_a^-$     |                      | $H^-$       |                      |
|-----------------|-------------|----------------------|-------------|----------------------|-------------|----------------------|-------------|----------------------|
|                 | $\Delta TS$ | $\Delta \int C_p dT$ | $\Delta TS$ | $\Delta \int C_p dT$ | $\Delta TS$ | $\Delta \int C_p dT$ | $\Delta TS$ | $\Delta \int C_p dT$ |
| 250             | 2.61        | -0.74                | 0.24        | 0.69                 | 2.37        | -1.42                | -0.24       | -0.69                |
| 300             | 3.22        | -0.82                | -0.13       | 1.07                 | 3.35        | -1.89                | 0.13        | -1.07                |
| 350             | 3.87        | -0.92                | -0.54       | 1.43                 | 4.41        | -2.35                | 0.54        | -1.43                |
| 400             | 4.57        | -1.06                | -0.96       | 1.75                 | 5.53        | -2.81                | 0.96        | -1.75                |
| 450             | 5.32        | -1.23                | -1.38       | 2.03                 | 6.70        | -3.26                | 1.38        | -2.03                |
| 500             | 6.13        | -1.44                | -1.78       | 2.27                 | 7.91        | -3.70                | 1.78        | -2.27                |
| 550             | 6.99        | -1.67                | -2.17       | 2.47                 | 9.16        | -4.14                | 2.17        | -2.47                |
| 600             | 7.90        | -1.94                | -2.54       | 2.63                 | 10.44       | -4.57                | 2.54        | -2.63                |
| 650             | 8.85        | -2.22                | -2.90       | 2.78                 | 11.76       | -5.00                | 2.90        | -2.78                |
| 700             | 9.85        | -2.53                | -3.25       | 2.90                 | 13.10       | -5.43                | 3.25        | -2.90                |
| 750             | 10.89       | -2.85                | -3.59       | 3.00                 | 14.48       | -5.85                | 3.59        | -3.00                |
| 800             | 11.96       | -3.18                | -3.92       | 3.09                 | 15.88       | -6.27                | 3.92        | -3.09                |
| 850             | 13.06       | -3.52                | -4.24       | 3.16                 | 17.30       | -6.69                | 4.24        | -3.16                |
| 900             | 14.19       | -3.88                | -4.56       | 3.23                 | 18.75       | -7.11                | 4.56        | -3.23                |
| 950             | 15.35       | -4.24                | -4.87       | 3.29                 | 20.22       | -7.53                | 4.87        | -3.29                |
| 1000            | 16.53       | -4.61                | -5.18       | 3.34                 | 21.71       | -7.94                | 5.18        | -3.34                |

**Table S3** The entropy and enthalpy corrections for energy barrier ( $E_a^+$  and  $E_a^-$ ) reaction energy ( $H^+$  and  $H^-$ ) for CO<sub>2</sub> decomposition on Fe<sub>2</sub>/Cu(100) surface at temperature from 250 to 1000 K. (Energy: kJ/mol Temperature: K)

| Temperature | $E_a^+$     |                      | $H^+$       |                      | $E_a^-$     |                      | $H^-$       |                      |
|-------------|-------------|----------------------|-------------|----------------------|-------------|----------------------|-------------|----------------------|
|             | $\Delta TS$ | $\Delta \int C_p dT$ | $\Delta TS$ | $\Delta \int C_p dT$ | $\Delta TS$ | $\Delta \int C_p dT$ | $\Delta TS$ | $\Delta \int C_p dT$ |
| 250         | 3.88        | -1.12                | 0.76        | -0.49                | 3.12        | -0.63                | -0.76       | 0.49                 |
| 300         | 4.79        | -1.24                | 0.75        | -0.34                | 4.04        | -0.90                | -0.75       | 0.34                 |
| 350         | 5.72        | -1.37                | 0.69        | -0.17                | 5.03        | -1.20                | -0.69       | 0.17                 |
| 400         | 6.70        | -1.51                | 0.60        | 0.01                 | 6.10        | -1.52                | -0.60       | -0.01                |
| 450         | 7.72        | -1.69                | 0.50        | 0.18                 | 7.22        | -1.86                | -0.50       | -0.18                |
| 500         | 8.79        | -1.88                | 0.40        | 0.33                 | 8.39        | -2.21                | -0.40       | -0.33                |
| 550         | 9.90        | -2.11                | 0.30        | 0.46                 | 9.60        | -2.57                | -0.30       | -0.46                |
| 600         | 11.06       | -2.36                | 0.21        | 0.57                 | 10.85       | -2.93                | -0.21       | -0.57                |
| 650         | 12.26       | -2.62                | 0.13        | 0.67                 | 12.13       | -3.29                | -0.13       | -0.67                |
| 700         | 13.49       | -2.91                | 0.05        | 0.75                 | 13.44       | -3.66                | -0.05       | -0.75                |
| 750         | 14.76       | -3.20                | -0.02       | 0.82                 | 14.79       | -4.03                | 0.02        | -0.82                |
| 800         | 16.07       | -3.52                | -0.09       | 0.89                 | 16.16       | -4.40                | 0.09        | -0.89                |
| 850         | 17.41       | -3.84                | -0.15       | 0.94                 | 17.55       | -4.78                | 0.15        | -0.94                |
| 900         | 18.77       | -4.17                | -0.20       | 0.99                 | 18.98       | -5.16                | 0.20        | -0.99                |
| 950         | 20.16       | -4.51                | -0.26       | 1.03                 | 20.42       | -5.54                | 0.26        | -1.03                |
| 1000        | 21.58       | -4.86                | -0.31       | 1.06                 | 21.89       | -5.92                | 0.31        | -1.06                |

**Table S4** The entropy and enthalpy corrections for energy barrier ( $E_a^+$  and  $E_a^-$ ) reaction energy ( $H^+$  and  $H^-$ ) for  $\text{CO}_2$  decomposition on  $\text{Fe}_3/\text{Cu}(100)$  surface at temperature from 250 to 1000 K. (Energy: kJ/mol Temperature: K)

| Temperature | $E_a^+$           |                     | $H^+$             |                     | $E_a^-$           |                     | $H^-$             |                     |
|-------------|-------------------|---------------------|-------------------|---------------------|-------------------|---------------------|-------------------|---------------------|
|             | $\Delta\text{TS}$ | $\Delta\int C_p dT$ | $\Delta\text{TS}$ | $\Delta\int C_p dT$ | $\Delta\text{TS}$ | $\Delta\int C_p dT$ | $\Delta\text{TS}$ | $\Delta\int C_p dT$ |
| 250         | -1.34             | 0.50                | -1.61             | 0.90                | 0.27              | -0.40               | 1.61              | -0.90               |
| 300         | -1.66             | 0.54                | -2.31             | 1.25                | 0.65              | -0.70               | 2.31              | -1.25               |
| 350         | -1.92             | 0.53                | -3.04             | 1.56                | 1.11              | -1.03               | 3.04              | -1.56               |
| 400         | -2.12             | 0.46                | -3.76             | 1.84                | 1.64              | -1.38               | 3.76              | -1.84               |
| 450         | -2.25             | 0.33                | -4.48             | 2.07                | 2.23              | -1.74               | 4.48              | -2.07               |
| 500         | -2.31             | 0.15                | -5.17             | 2.25                | 2.86              | -2.10               | 5.17              | -2.25               |
| 550         | -2.31             | -0.07               | -5.84             | 2.40                | 3.54              | -2.47               | 5.84              | -2.40               |
| 600         | -2.25             | -0.33               | -6.50             | 2.52                | 4.25              | -2.85               | 6.5               | -2.52               |
| 650         | -2.15             | -0.61               | -7.14             | 2.61                | 4.99              | -3.22               | 7.14              | -2.61               |
| 700         | -2.00             | -0.91               | -7.77             | 2.69                | 5.77              | -3.60               | 7.77              | -2.69               |
| 750         | -1.81             | -1.23               | -8.38             | 2.75                | 6.57              | -3.98               | 8.38              | -2.75               |
| 800         | -1.58             | -1.57               | -8.99             | 2.79                | 7.40              | -4.36               | 8.99              | -2.79               |
| 850         | -1.32             | -1.92               | -9.58             | 2.83                | 8.26              | -4.75               | 9.58              | -2.83               |
| 900         | -1.03             | -2.28               | -10.17            | 2.85                | 9.15              | -5.13               | 10.17             | -2.85               |
| 950         | -0.71             | -2.64               | -10.76            | 2.87                | 10.05             | -5.52               | 10.76             | -2.87               |
| 1000        | -0.37             | -3.02               | -11.34            | 2.89                | 10.98             | -5.91               | 11.34             | -2.89               |

**Table S5** The entropy and enthalpy corrections for energy barrier ( $E_a^+$  and  $E_a^-$ ) reaction energy ( $H^+$  and  $H^-$ ) for  $\text{CO}_2$  decomposition on  $\text{Fe}_4/\text{Cu}(100)$  surface at temperature from 250 to 1000 K. (Energy: kJ/mol Temperature: K)

| Temperature | $E_a^+$           |                     | $H^+$             |                     | $E_a^-$           |                     | $H^-$             |                     |
|-------------|-------------------|---------------------|-------------------|---------------------|-------------------|---------------------|-------------------|---------------------|
|             | $\Delta\text{TS}$ | $\Delta\int C_p dT$ | $\Delta\text{TS}$ | $\Delta\int C_p dT$ | $\Delta\text{TS}$ | $\Delta\int C_p dT$ | $\Delta\text{TS}$ | $\Delta\int C_p dT$ |
| 250         | -2.78             | 0.80                | -8.11             | 2.10                | 5.34              | -1.30               | 8.11              | -2.10               |
| 300         | -3.32             | 0.78                | -10.08            | 2.41                | 6.76              | -1.63               | 10.08             | -2.41               |
| 350         | -3.78             | 0.70                | -12.05            | 2.68                | 8.27              | -1.98               | 12.05             | -2.68               |
| 400         | -4.17             | 0.56                | -14.01            | 2.90                | 9.84              | -2.34               | 14.01             | -2.90               |
| 450         | -4.48             | 0.36                | -15.94            | 3.07                | 11.46             | -2.71               | 15.94             | -3.07               |
| 500         | -4.72             | 0.12                | -17.85            | 3.20                | 13.12             | -3.08               | 17.85             | -3.20               |
| 550         | -4.90             | -0.16               | -19.73            | 3.29                | 14.82             | -3.45               | 19.73             | -3.29               |
| 600         | -5.03             | -0.47               | -21.59            | 3.35                | 16.56             | -3.83               | 21.59             | -3.35               |
| 650         | -5.10             | -0.81               | -23.43            | 3.40                | 18.33             | -4.20               | 23.43             | -3.40               |
| 700         | -5.13             | -1.16               | -25.26            | 3.42                | 20.13             | -4.58               | 25.26             | -3.42               |
| 750         | -5.12             | -1.52               | -27.08            | 3.43                | 21.96             | -4.96               | 27.08             | -3.43               |
| 800         | -5.07             | -1.90               | -28.89            | 3.44                | 23.82             | -5.33               | 28.89             | -3.44               |
| 850         | -4.99             | -2.28               | -30.69            | 3.43                | 25.70             | -5.71               | 30.69             | -3.43               |
| 900         | -4.88             | -2.67               | -32.48            | 3.42                | 27.60             | -6.10               | 32.48             | -3.42               |
| 950         | -4.75             | -3.07               | -34.27            | 3.41                | 29.53             | -6.48               | 34.27             | -3.41               |
| 1000        | -4.59             | -3.47               | -36.06            | 3.39                | 31.48             | -6.86               | 36.06             | -3.39               |



**Table S6** The entropy and enthalpy corrections for energy barrier ( $E_a^+$  and  $E_a^-$ ) reaction energy ( $H^+$  and  $H^-$ ) for CO<sub>2</sub> decomposition on Fe<sub>5</sub>/Cu(100) surface at temperature from 250 to 1000 K. (Energy: kJ/mol Temperature: K)

| Temperature | $E_a^+$     |                      | $H^+$       |                      | $E_a^-$     |                      | $H^-$       |                      |
|-------------|-------------|----------------------|-------------|----------------------|-------------|----------------------|-------------|----------------------|
|             | $\Delta TS$ | $\Delta \int C_p dT$ | $\Delta TS$ | $\Delta \int C_p dT$ | $\Delta TS$ | $\Delta \int C_p dT$ | $\Delta TS$ | $\Delta \int C_p dT$ |
| 250         | -2.85       | 0.75                 | -8.18       | 2.28                 | 5.33        | -1.53                | 8.18        | -2.28                |
| 300         | -3.39       | 0.73                 | -10.21      | 2.64                 | 6.82        | -1.92                | 10.21       | -2.64                |
| 350         | -3.85       | 0.63                 | -12.24      | 2.95                 | 8.39        | -2.31                | 12.24       | -2.95                |
| 400         | -4.24       | 0.48                 | -14.26      | 3.20                 | 10.02       | -2.71                | 14.26       | -3.20                |
| 450         | -4.56       | 0.28                 | -16.25      | 3.39                 | 11.69       | -3.11                | 16.25       | -3.39                |
| 500         | -4.80       | 0.03                 | -18.21      | 3.54                 | 13.41       | -3.51                | 18.21       | -3.54                |
| 550         | -4.98       | -0.25                | -20.15      | 3.65                 | 15.16       | -3.91                | 20.15       | -3.65                |
| 600         | -5.11       | -0.57                | -22.07      | 3.73                 | 16.95       | -4.30                | 22.07       | -3.73                |
| 650         | -5.19       | -0.90                | -23.97      | 3.79                 | 18.78       | -4.69                | 23.97       | -3.79                |
| 700         | -5.22       | -1.25                | -25.85      | 3.83                 | 20.63       | -5.08                | 25.85       | -3.83                |
| 750         | -5.22       | -1.62                | -27.72      | 3.86                 | 22.50       | -5.48                | 27.72       | -3.86                |
| 800         | -5.18       | -1.99                | -29.59      | 3.87                 | 24.41       | -5.87                | 29.59       | -3.87                |
| 850         | -5.11       | -2.38                | -31.44      | 3.88                 | 26.34       | -6.26                | 31.44       | -3.88                |
| 900         | -5.00       | -2.77                | -33.29      | 3.88                 | 28.29       | -6.65                | 33.29       | -3.88                |
| 950         | -4.88       | -3.17                | -35.14      | 3.88                 | 30.26       | -7.04                | 35.14       | -3.88                |
| 1000        | -4.72       | -3.57                | -36.98      | 3.87                 | 32.26       | -7.43                | 36.98       | -3.87                |

**Table S7** The entropy and enthalpy corrections for energy barrier ( $E_a^+$  and  $E_a^-$ ) reaction energy ( $H^+$  and  $H^-$ ) for CO<sub>2</sub> decomposition on Fe<sub>6</sub>/Cu(100) surface at temperature from 250 to 1000 K. (Energy: kJ/mol Temperature: K)

| Temperature | $E_a^+$     |                      | $H^+$       |                      | $E_a^-$     |                      | $H^-$       |                      |
|-------------|-------------|----------------------|-------------|----------------------|-------------|----------------------|-------------|----------------------|
|             | $\Delta TS$ | $\Delta \int C_p dT$ | $\Delta TS$ | $\Delta \int C_p dT$ | $\Delta TS$ | $\Delta \int C_p dT$ | $\Delta TS$ | $\Delta \int C_p dT$ |
| 250         | -3.75       | 0.80                 | -9.32       | 2.09                 | 5.56        | -1.29                | 9.32        | -2.09                |
| 300         | -4.47       | 0.77                 | -11.51      | 2.40                 | 7.04        | -1.62                | 11.51       | -2.40                |
| 350         | -5.12       | 0.68                 | -13.71      | 2.66                 | 8.59        | -1.97                | 13.71       | -2.66                |
| 400         | -5.69       | 0.53                 | -15.9       | 2.87                 | 10.21       | -2.34                | 15.9        | -2.87                |
| 450         | -6.19       | 0.33                 | -18.06      | 3.03                 | 11.87       | -2.71                | 18.06       | -3.03                |
| 500         | -6.61       | 0.08                 | -20.19      | 3.15                 | 13.58       | -3.08                | 20.19       | -3.15                |
| 550         | -6.97       | -0.21                | -22.30      | 3.24                 | 15.33       | -3.45                | 22.3        | -3.24                |
| 600         | -7.28       | -0.52                | -24.39      | 3.30                 | 17.11       | -3.82                | 24.39       | -3.30                |
| 650         | -7.54       | -0.86                | -26.46      | 3.33                 | 18.93       | -4.20                | 26.46       | -3.33                |
| 700         | -7.75       | -1.21                | -28.52      | 3.36                 | 20.77       | -4.57                | 28.52       | -3.36                |
| 750         | -7.92       | -1.58                | -30.57      | 3.36                 | 22.64       | -4.94                | 30.57       | -3.36                |
| 800         | -8.06       | -1.96                | -32.60      | 3.36                 | 24.54       | -5.32                | 32.6        | -3.36                |
| 850         | -8.17       | -2.35                | -34.63      | 3.35                 | 26.47       | -5.70                | 34.63       | -3.35                |
| 900         | -8.24       | -2.74                | -36.66      | 3.34                 | 28.41       | -6.08                | 36.66       | -3.34                |
| 950         | -8.29       | -3.13                | -38.68      | 3.33                 | 30.38       | -6.46                | 38.68       | -3.33                |
| 1000        | -8.32       | -3.54                | -40.69      | 3.31                 | 32.37       | -6.84                | 40.69       | -3.31                |

**Table S8** The entropy and enthalpy corrections for energy barrier ( $E_a^+$  and  $E_a^-$ ) reaction energy ( $H^+$  and  $H^-$ ) for  $\text{CO}_2$  decomposition on  $\text{Fe}_7/\text{Cu}(100)$  surface at temperature from 250 to 1000 K. (Energy: kJ/mol Temperature: K)

| Temperature | $E_a^+$     |                      | $H^+$       |                      | $E_a^-$     |                      | $H^-$       |                      |
|-------------|-------------|----------------------|-------------|----------------------|-------------|----------------------|-------------|----------------------|
|             | $\Delta TS$ | $\Delta \int C_p dT$ | $\Delta TS$ | $\Delta \int C_p dT$ | $\Delta TS$ | $\Delta \int C_p dT$ | $\Delta TS$ | $\Delta \int C_p dT$ |
| 250         | -1.46       | 0.52                 | -4.84       | 1.52                 | 3.38        | -1.00                | 4.84        | -1.52                |
| 300         | -1.74       | 0.51                 | -6.19       | 1.86                 | 4.45        | -1.36                | 6.19        | -1.86                |
| 350         | -1.95       | 0.43                 | -7.54       | 2.16                 | 5.59        | -1.73                | 7.54        | -2.16                |
| 400         | -2.07       | 0.28                 | -8.87       | 2.40                 | 6.80        | -2.11                | 8.87        | -2.40                |
| 450         | -2.12       | 0.08                 | -10.18      | 2.59                 | 8.06        | -2.50                | 10.18       | -2.59                |
| 500         | -2.10       | -0.16                | -11.46      | 2.73                 | 9.36        | -2.89                | 11.46       | -2.73                |
| 550         | -2.01       | -0.45                | -12.71      | 2.83                 | 10.70       | -3.27                | 12.71       | -2.83                |
| 600         | -1.86       | -0.76                | -13.94      | 2.90                 | 12.08       | -3.66                | 13.94       | -2.90                |
| 650         | -1.67       | -1.10                | -15.15      | 2.95                 | 13.49       | -4.05                | 15.15       | -2.95                |
| 700         | -1.43       | -1.45                | -16.35      | 2.98                 | 14.92       | -4.43                | 16.35       | -2.98                |
| 750         | -1.15       | -1.82                | -17.54      | 3.00                 | 16.39       | -4.82                | 17.54       | -3.00                |
| 800         | -0.83       | -2.2                 | -18.72      | 3.01                 | 17.88       | -5.21                | 18.72       | -3.01                |
| 850         | -0.48       | -2.59                | -19.89      | 3.01                 | 19.40       | -5.60                | 19.89       | -3.01                |
| 900         | -0.11       | -2.98                | -21.05      | 3.00                 | 20.94       | -5.98                | 21.05       | -3.00                |
| 950         | 0.30        | -3.38                | -22.21      | 2.99                 | 22.51       | -6.37                | 22.21       | -2.99                |
| 1000        | 0.73        | -3.78                | -23.37      | 2.98                 | 24.09       | -6.77                | 23.37       | -2.98                |

**Table S9** The entropy and enthalpy corrections for energy barrier ( $E_a^+$  and  $E_a^-$ ) reaction energy ( $H^+$  and  $H^-$ ) for CO<sub>2</sub> decomposition on Fe<sub>8</sub>/Cu(100) surface at temperature from 250 to 1000 K. (Energy: kJ/mol Temperature: K)

| Temperature | $E_a^+$     |                      | $H^+$       |                      | $E_a^-$     |                      | $H^-$       |                      |
|-------------|-------------|----------------------|-------------|----------------------|-------------|----------------------|-------------|----------------------|
|             | $\Delta TS$ | $\Delta \int C_p dT$ | $\Delta TS$ | $\Delta \int C_p dT$ | $\Delta TS$ | $\Delta \int C_p dT$ | $\Delta TS$ | $\Delta \int C_p dT$ |
| 250         | -2.37       | 0.61                 | -7.92       | 1.90                 | 5.55        | -1.29                | 7.92        | -1.90                |
| 300         | -2.80       | 0.58                 | -9.89       | 2.25                 | 7.08        | -1.68                | 9.89        | -2.25                |
| 350         | -3.17       | 0.48                 | -11.86      | 2.55                 | 8.69        | -2.07                | 11.86       | -2.55                |
| 400         | -3.46       | 0.33                 | -13.80      | 2.79                 | 10.34       | -2.46                | 13.80       | -2.79                |
| 450         | -3.68       | 0.13                 | -15.72      | 2.97                 | 12.05       | -2.85                | 15.72       | -2.97                |
| 500         | -3.83       | -0.12                | -17.61      | 3.11                 | 13.78       | -3.23                | 17.61       | -3.11                |
| 550         | -3.92       | -0.40                | -19.48      | 3.20                 | 15.56       | -3.60                | 19.48       | -3.20                |
| 600         | -3.96       | -0.70                | -21.32      | 3.27                 | 17.36       | -3.97                | 21.32       | -3.27                |
| 650         | -3.95       | -1.03                | -23.14      | 3.31                 | 19.19       | -4.34                | 23.14       | -3.31                |
| 700         | -3.90       | -1.37                | -24.94      | 3.33                 | 21.04       | -4.70                | 24.94       | -3.33                |
| 750         | -3.81       | -1.73                | -26.73      | 3.34                 | 22.92       | -5.07                | 26.73       | -3.34                |
| 800         | -3.69       | -2.09                | -28.51      | 3.34                 | 24.83       | -5.43                | 28.51       | -3.34                |
| 850         | -3.53       | -2.46                | -30.29      | 3.34                 | 26.76       | -5.80                | 30.29       | -3.34                |
| 900         | -3.35       | -2.84                | -32.06      | 3.32                 | 28.71       | -6.17                | 32.06       | -3.32                |
| 950         | -3.14       | -3.23                | -33.82      | 3.31                 | 30.68       | -6.54                | 33.82       | -3.31                |
| 1000        | -2.90       | -3.62                | -35.58      | 3.29                 | 32.68       | -6.91                | 35.58       | -3.29                |

**Table S10** The entropy and enthalpy corrections for energy barrier ( $E_a^+$  and  $E_a^-$ ) reaction energy ( $H^+$  and  $H^-$ ) for CO<sub>2</sub> decomposition on Fe<sub>9</sub>/Cu(100) surface at temperature from 250 to 1000 K. (Energy: kJ/mol Temperature: K)

| Temperatur<br>e | $E_a^+$     |                      | $H^+$       |                      | $E_a^-$     |                      | $H^-$       |                      |
|-----------------|-------------|----------------------|-------------|----------------------|-------------|----------------------|-------------|----------------------|
|                 | $\Delta TS$ | $\Delta \int C_p dT$ | $\Delta TS$ | $\Delta \int C_p dT$ | $\Delta TS$ | $\Delta \int C_p dT$ | $\Delta TS$ | $\Delta \int C_p dT$ |
| 250             | -4.36       | 0.78                 | -4.52       | 1.62                 | 0.17        | -0.84                | 4.52        | -1.62                |
| 300             | -5.19       | 0.74                 | -5.82       | 1.98                 | 0.64        | -1.24                | 5.82        | -1.98                |
| 350             | -5.94       | 0.64                 | -7.12       | 2.28                 | 1.18        | -1.64                | 7.12        | -2.28                |
| 400             | -6.63       | 0.49                 | -8.40       | 2.53                 | 1.78        | -2.04                | 8.40        | -2.53                |
| 450             | -7.24       | 0.28                 | -9.65       | 2.72                 | 2.42        | -2.44                | 9.65        | -2.72                |
| 500             | -7.78       | 0.03                 | -10.88      | 2.86                 | 3.10        | -2.83                | 10.88       | -2.86                |
| 550             | -8.26       | -0.25                | -12.07      | 2.96                 | 3.81        | -3.21                | 12.07       | -2.96                |
| 600             | -8.69       | -0.56                | -13.24      | 3.03                 | 4.56        | -3.60                | 13.24       | -3.03                |
| 650             | -9.07       | -0.89                | -14.40      | 3.08                 | 5.33        | -3.97                | 14.40       | -3.08                |
| 700             | -9.41       | -1.24                | -15.53      | 3.11                 | 6.13        | -4.35                | 15.53       | -3.11                |
| 750             | -9.71       | -1.60                | -16.66      | 3.12                 | 6.96        | -4.72                | 16.66       | -3.12                |
| 800             | -9.97       | -1.97                | -17.78      | 3.13                 | 7.81        | -5.10                | 17.78       | -3.13                |
| 850             | -10.21      | -2.35                | -18.89      | 3.13                 | 8.68        | -5.48                | 18.89       | -3.13                |
| 900             | -10.41      | -2.73                | -19.99      | 3.12                 | 9.58        | -5.85                | 19.99       | -3.12                |
| 950             | -10.59      | -3.12                | -21.09      | 3.11                 | 10.50       | -6.23                | 21.09       | -3.11                |
| 1000            | -10.74      | -3.51                | -22.19      | 3.10                 | 11.44       | -6.61                | 22.19       | -3.10                |

**Table S11** The forward and inverse corrected activation energy barrier ( $\Delta E_a^+$  and  $\Delta E_a^-$ ) and equilibrium constants ( $k_+$ ,  $k_-$  and  $K$ ) for CO<sub>2</sub> on Fe<sub>1</sub>/Cu(100) surface at temperature from 250 to 1000 K. (Energy: kJ/mol Temperature: K  $k$ : s<sup>-1</sup>)

| Temperature (K) | $\Delta E_a^+$ | $\Delta E_a^-$ | $k_+$                 | $k_-$              | $K(k_+/k_-)$       |
|-----------------|----------------|----------------|-----------------------|--------------------|--------------------|
| 250             | 42.98          | 50.93          | $8.50 \times 10^3$    | $9.54 \times 10^1$ | $8.91 \times 10^1$ |
| 300             | 43.51          | 51.45          | $2.16 \times 10^5$    | $4.60 \times 10^3$ | $4.69 \times 10^1$ |
| 350             | 44.06          | 52.04          | $2.16 \times 10^6$    | $7.14 \times 10^4$ | $3.03 \times 10^1$ |
| 400             | 44.62          | 52.70          | $1.21 \times 10^7$    | $5.47 \times 10^5$ | $2.22 \times 10^1$ |
| 450             | 45.20          | 53.42          | $4.61 \times 10^7$    | $2.63 \times 10^6$ | $1.75 \times 10^1$ |
| 500             | 45.80          | 54.19          | $1.34 \times 10^8$    | $9.11 \times 10^6$ | $1.47 \times 10^1$ |
| 550             | 46.42          | 55.00          | $3.17 \times 10^8$    | $2.49 \times 10^7$ | $1.27 \times 10^1$ |
| 600             | 47.07          | 55.85          | $6.49 \times 10^8$    | $5.73 \times 10^7$ | $1.13 \times 10^1$ |
| 650             | 47.74          | 56.74          | $1.19 \times 10^9$    | $1.15 \times 10^8$ | $1.03 \times 10^1$ |
| 700             | 48.43          | 57.66          | $1.98 \times 10^9$    | $2.08 \times 10^8$ | $9.51 \times 10^0$ |
| 750             | 49.15          | 58.61          | $3.07 \times 10^9$    | $3.46 \times 10^8$ | $8.89 \times 10^0$ |
| 800             | 49.88          | 59.59          | $4.50 \times 10^9$    | $5.37 \times 10^8$ | $8.38 \times 10^0$ |
| 850             | 50.64          | 60.60          | $6.28 \times 10^9$    | $7.89 \times 10^8$ | $7.97 \times 10^0$ |
| 900             | 51.42          | 61.63          | $8.43 \times 10^9$    | $1.11 \times 10^9$ | $7.62 \times 10^0$ |
| 950             | 52.22          | 62.68          | $1.09 \times 10^{10}$ | $1.49 \times 10^9$ | $7.32 \times 10^0$ |
| 1000            | 53.04          | 63.75          | $1.38 \times 10^{10}$ | $1.95 \times 10^9$ | $7.07 \times 10^0$ |

**Table S12** The forward and inverse corrected activation energy barrier ( $\Delta E_a^+$  and  $\Delta E_a^-$ ) and equilibrium constants ( $k_+$ ,  $k_-$  and  $K$ ) for CO<sub>2</sub> on Fe<sub>2</sub>/Cu(100) surface at temperature from 250 to 1000 K. (Energy: kJ/mol Temperature: K  $k$ : s<sup>-1</sup>)

| Temperature | $\Delta E_a^+$ | $\Delta E_a^-$ | $k_+$              | $k_-$                 | $K(k_+/k_-)$       |
|-------------|----------------|----------------|--------------------|-----------------------|--------------------|
| 250         | 57.83          | 102.15         | $3.79 \times 10^0$ | $1.95 \times 10^{-9}$ | $1.95 \times 10^9$ |
| 300         | 58.62          | 102.79         | $2.85 \times 10^2$ | $5.41 \times 10^{-6}$ | $5.27 \times 10^7$ |
| 350         | 59.42          | 103.49         | $6.20 \times 10^3$ | $1.54 \times 10^{-3}$ | $4.04 \times 10^6$ |
| 400         | 60.25          | 104.23         | $6.20 \times 10^4$ | $1.05 \times 10^{-1}$ | $5.92 \times 10^5$ |
| 450         | 61.10          | 105.01         | $3.70 \times 10^5$ | $2.76 \times 10^0$    | $1.34 \times 10^5$ |
| 500         | 61.97          | 105.83         | $1.54 \times 10^6$ | $3.76 \times 10^1$    | $4.09 \times 10^4$ |
| 550         | 62.86          | 106.69         | $4.91 \times 10^6$ | $3.15 \times 10^2$    | $1.56 \times 10^4$ |
| 600         | 63.77          | 107.58         | $1.29 \times 10^7$ | $1.84 \times 10^3$    | $6.98 \times 10^3$ |
| 650         | 64.70          | 108.50         | $2.89 \times 10^7$ | $8.17 \times 10^3$    | $3.54 \times 10^3$ |
| 700         | 65.65          | 109.44         | $5.78 \times 10^7$ | $2.91 \times 10^4$    | $1.98 \times 10^3$ |
| 750         | 66.63          | 110.42         | $1.05 \times 10^8$ | $8.73 \times 10^4$    | $1.20 \times 10^3$ |
| 800         | 67.62          | 111.41         | $1.76 \times 10^8$ | $2.27 \times 10^5$    | $7.74 \times 10^2$ |
| 850         | 68.63          | 112.43         | $2.77 \times 10^8$ | $5.27 \times 10^5$    | $5.26 \times 10^2$ |
| 900         | 69.67          | 113.48         | $4.14 \times 10^8$ | $1.11 \times 10^6$    | $3.73 \times 10^2$ |
| 950         | 70.72          | 114.54         | $5.92 \times 10^8$ | $2.15 \times 10^6$    | $2.75 \times 10^2$ |
| 1000        | 71.79          | 115.63         | $8.14 \times 10^8$ | $3.90 \times 10^6$    | $2.09 \times 10^2$ |

**Table S13** The forward and inverse corrected activation energy barrier ( $\Delta E_a^+$  and  $\Delta E_a^-$ ) and equilibrium constants ( $k_+$ ,  $k_-$  and  $K$ ) for CO<sub>2</sub> on Fe<sub>3</sub>/Cu(100) surface at temperature from 250 to 1000 K. (Energy: kJ/mol Temperature: K  $k$ : s<sup>-1</sup>)

| Temperature | $\Delta E_a^+$ | $\Delta E_a^-$ | $k_+$                 | $k_-$                 | $K(k_+/k_-)$       |
|-------------|----------------|----------------|-----------------------|-----------------------|--------------------|
| 250         | 56.98          | 96.44          | $7.64 \times 10^1$    | $1.11 \times 10^{-7}$ | $6.86 \times 10^8$ |
| 300         | 56.71          | 96.52          | $8.22 \times 10^3$    | $2.46 \times 10^{-4}$ | $3.34 \times 10^7$ |
| 350         | 56.43          | 96.66          | $2.33 \times 10^5$    | $5.91 \times 10^{-2}$ | $3.93 \times 10^6$ |
| 400         | 56.16          | 96.84          | $2.85 \times 10^6$    | $3.56 \times 10^0$    | $8.00 \times 10^5$ |
| 450         | 55.90          | 97.07          | $1.99 \times 10^7$    | $8.51 \times 10^1$    | $2.34 \times 10^5$ |
| 500         | 55.66          | 97.33          | $9.40 \times 10^7$    | $1.07 \times 10^3$    | $8.80 \times 10^4$ |
| 550         | 55.44          | 97.64          | $3.33 \times 10^8$    | $8.40 \times 10^3$    | $3.97 \times 10^4$ |
| 600         | 55.24          | 97.98          | $9.53 \times 10^8$    | $4.65 \times 10^4$    | $2.05 \times 10^4$ |
| 650         | 55.07          | 98.35          | $2.31 \times 10^9$    | $1.97 \times 10^5$    | $1.17 \times 10^4$ |
| 700         | 54.91          | 98.74          | $4.90 \times 10^9$    | $6.74 \times 10^5$    | $7.27 \times 10^3$ |
| 750         | 54.78          | 99.17          | $9.40 \times 10^9$    | $1.95 \times 10^6$    | $4.81 \times 10^3$ |
| 800         | 54.67          | 99.62          | $1.65 \times 10^{10}$ | $4.93 \times 10^6$    | $3.36 \times 10^3$ |
| 850         | 54.58          | 100.09         | $2.72 \times 10^{10}$ | $1.11 \times 10^7$    | $2.44 \times 10^3$ |
| 900         | 54.51          | 100.59         | $4.21 \times 10^{10}$ | $2.29 \times 10^7$    | $1.84 \times 10^3$ |
| 950         | 54.47          | 101.11         | $6.21 \times 10^{10}$ | $4.34 \times 10^7$    | $1.43 \times 10^3$ |
| 1000        | 54.44          | 101.65         | $8.80 \times 10^{10}$ | $7.72 \times 10^7$    | $1.14 \times 10^3$ |



**Table S14** The forward and inverse corrected activation energy barrier ( $\Delta E_a^+$  and  $\Delta E_a^-$ ) and equilibrium constants ( $k_+$ ,  $k_-$  and  $K$ ) for CO<sub>2</sub> on Fe<sub>4</sub>/Cu(100) surface at temperature from 250 to 1000 K. (Energy: kJ/mol Temperature: K  $k$ : s<sup>-1</sup>)

| Temperature | $\Delta E_a^+$ | $\Delta E_a^-$ | $k_+$                 | $k_-$                 | $K(k_+/k_-)$          |
|-------------|----------------|----------------|-----------------------|-----------------------|-----------------------|
| 250         | 26.02          | 99.44          | $3.61 \times 10^8$    | $2.25 \times 10^{-9}$ | $1.60 \times 10^{17}$ |
| 300         | 25.46          | 100.54         | $3.63 \times 10^9$    | $4.21 \times 10^{-6}$ | $8.62 \times 10^{14}$ |
| 350         | 24.92          | 101.70         | $1.88 \times 10^{10}$ | $8.98 \times 10^{-4}$ | $2.10 \times 10^{13}$ |
| 400         | 24.39          | 102.90         | $6.45 \times 10^{10}$ | $4.93 \times 10^{-2}$ | $1.31 \times 10^{12}$ |
| 450         | 23.88          | 104.15         | $1.67 \times 10^{11}$ | $1.10 \times 10^0$    | $1.52 \times 10^{11}$ |
| 500         | 23.39          | 105.45         | $3.55 \times 10^{11}$ | $1.30 \times 10^1$    | $2.73 \times 10^{10}$ |
| 550         | 22.93          | 106.78         | $6.54 \times 10^{11}$ | $9.76 \times 10^1$    | $6.70 \times 10^9$    |
| 600         | 22.50          | 108.14         | $1.08 \times 10^{12}$ | $5.20 \times 10^2$    | $2.09 \times 10^9$    |
| 650         | 22.09          | 109.54         | $1.65 \times 10^{12}$ | $2.13 \times 10^3$    | $7.77 \times 10^8$    |
| 700         | 21.71          | 110.96         | $2.36 \times 10^{12}$ | $7.09 \times 10^3$    | $3.33 \times 10^8$    |
| 750         | 21.36          | 112.41         | $3.21 \times 10^{12}$ | $2.00 \times 10^4$    | $1.60 \times 10^8$    |
| 800         | 21.03          | 113.89         | $4.17 \times 10^{12}$ | $4.95 \times 10^4$    | $8.44 \times 10^7$    |
| 850         | 20.73          | 115.39         | $5.25 \times 10^{12}$ | $1.10 \times 10^5$    | $4.79 \times 10^7$    |
| 900         | 20.44          | 116.91         | $6.41 \times 10^{12}$ | $2.21 \times 10^5$    | $2.90 \times 10^7$    |
| 950         | 20.18          | 118.46         | $7.65 \times 10^{12}$ | $4.14 \times 10^5$    | $1.85 \times 10^7$    |
| 1000        | 19.94          | 120.02         | $8.95 \times 10^{12}$ | $7.26 \times 10^5$    | $1.23 \times 10^7$    |

**Table S15** The forward and inverse corrected activation energy barrier ( $\Delta E_a^+$  and  $\Delta E_a^-$ ) and equilibrium constants ( $k_+$ ,  $k_-$  and  $K$ ) for CO<sub>2</sub> on Fe<sub>5</sub>/Cu(100) surface at temperature from 250 to 1000 K. (Energy: kJ/mol Temperature: K  $k$ : s<sup>-1</sup>)

| Temperature | $\Delta E_a^+$ | $\Delta E_a^-$ | $k_+$                 | $k_-$                 | $K(k_+/k_-)$          |
|-------------|----------------|----------------|-----------------------|-----------------------|-----------------------|
| 250         | 28.57          | 99.86          | $1.07 \times 10^8$    | $1.66 \times 10^{-9}$ | $6.48 \times 10^{16}$ |
| 300         | 28.01          | 100.97         | $1.33 \times 10^9$    | $3.20 \times 10^{-6}$ | $4.17 \times 10^{14}$ |
| 350         | 27.45          | 102.14         | $8.03 \times 10^9$    | $6.95 \times 10^{-4}$ | $1.16 \times 10^{13}$ |
| 400         | 26.91          | 103.36         | $3.07 \times 10^{10}$ | $3.86 \times 10^{-2}$ | $7.95 \times 10^{11}$ |
| 450         | 26.39          | 104.64         | $8.67 \times 10^{10}$ | $8.68 \times 10^{-1}$ | $9.99 \times 10^{10}$ |
| 500         | 25.89          | 105.96         | $1.98 \times 10^{11}$ | $1.04 \times 10^1$    | $1.91 \times 10^{10}$ |
| 550         | 25.43          | 107.32         | $3.86 \times 10^{11}$ | $7.81 \times 10^1$    | $4.94 \times 10^9$    |
| 600         | 24.99          | 108.71         | $6.69 \times 10^{11}$ | $4.17 \times 10^2$    | $1.61 \times 10^9$    |
| 650         | 24.58          | 110.14         | $1.06 \times 10^{12}$ | $1.71 \times 10^3$    | $6.21 \times 10^8$    |
| 700         | 24.19          | 111.60         | $1.57 \times 10^{12}$ | $5.71 \times 10^3$    | $2.75 \times 10^8$    |
| 750         | 23.83          | 113.09         | $2.20 \times 10^{12}$ | $1.62 \times 10^4$    | $1.36 \times 10^8$    |
| 800         | 23.49          | 114.60         | $2.93 \times 10^{12}$ | $4.00 \times 10^4$    | $7.33 \times 10^7$    |
| 850         | 23.18          | 116.14         | $3.77 \times 10^{12}$ | $8.86 \times 10^4$    | $4.26 \times 10^7$    |
| 900         | 22.89          | 117.70         | $4.70 \times 10^{12}$ | $1.79 \times 10^5$    | $2.62 \times 10^7$    |
| 950         | 22.62          | 119.28         | $5.72 \times 10^{12}$ | $3.36 \times 10^5$    | $1.70 \times 10^7$    |
| 1000        | 22.38          | 120.88         | $6.79 \times 10^{12}$ | $5.89 \times 10^5$    | $1.15 \times 10^7$    |

**Table S16** The forward and inverse corrected activation energy barrier ( $\Delta E_a^+$  and  $\Delta E_a^-$ ) and equilibrium constants ( $k_+$ ,  $k_-$  and  $K$ ) for CO<sub>2</sub> on Fe<sub>6</sub>/Cu(100) surface at temperature from 250 to 1000 K. (Energy: kJ/mol Temperature: K  $k$ : s<sup>-1</sup>)

| Temperature | $\Delta E_a^+$ | $\Delta E_a^-$ | $k_+$                 | $k_-$                  | $K(k_+/k_-)$          |
|-------------|----------------|----------------|-----------------------|------------------------|-----------------------|
| 250         | 32.01          | 112.17         | $3.16 \times 10^7$    | $4.45 \times 10^{-12}$ | $7.12 \times 10^{18}$ |
| 300         | 31.26          | 113.31         | $5.56 \times 10^8$    | $2.26 \times 10^{-8}$  | $2.46 \times 10^{16}$ |
| 350         | 30.52          | 114.51         | $4.30 \times 10^9$    | $9.87 \times 10^{-6}$  | $4.35 \times 10^{14}$ |
| 400         | 29.80          | 115.77         | $1.98 \times 10^{10}$ | $9.27 \times 10^{-4}$  | $2.14 \times 10^{13}$ |
| 450         | 29.10          | 117.06         | $6.46 \times 10^{10}$ | $3.13 \times 10^{-2}$  | $2.06 \times 10^{12}$ |
| 500         | 28.42          | 118.40         | $1.65 \times 10^{11}$ | $5.19 \times 10^{-1}$  | $3.19 \times 10^{11}$ |
| 550         | 27.78          | 119.78         | $3.55 \times 10^{11}$ | $5.12 \times 10^0$     | $6.94 \times 10^{10}$ |
| 600         | 27.16          | 121.19         | $6.67 \times 10^{11}$ | $3.42 \times 10^1$     | $1.95 \times 10^{10}$ |
| 650         | 26.56          | 122.63         | $1.13 \times 10^{12}$ | $1.70 \times 10^2$     | $6.66 \times 10^9$    |
| 700         | 26.00          | 124.10         | $1.77 \times 10^{12}$ | $6.67 \times 10^2$     | $2.66 \times 10^9$    |
| 750         | 25.46          | 125.60         | $2.60 \times 10^{12}$ | $2.17 \times 10^3$     | $1.20 \times 10^9$    |
| 800         | 24.94          | 127.12         | $3.63 \times 10^{12}$ | $6.09 \times 10^3$     | $5.96 \times 10^8$    |
| 850         | 24.45          | 128.66         | $4.85 \times 10^{12}$ | $1.51 \times 10^4$     | $3.22 \times 10^8$    |
| 900         | 23.98          | 130.23         | $6.26 \times 10^{12}$ | $3.36 \times 10^4$     | $1.86 \times 10^8$    |
| 950         | 23.53          | 131.82         | $7.84 \times 10^{12}$ | $6.86 \times 10^4$     | $1.14 \times 10^8$    |
| 1000        | 23.11          | 133.43         | $9.57 \times 10^{12}$ | $1.30 \times 10^5$     | $7.35 \times 10^7$    |

**Table S17** The forward and inverse corrected activation energy barrier ( $\Delta E_a^+$  and  $\Delta E_a^-$ ) and equilibrium constants ( $k_+$ ,  $k_-$  and  $K$ ) for CO<sub>2</sub> on Fe<sub>7</sub>/Cu(100) surface at temperature from 250 to 1000 K. (Energy: kJ/mol Temperature: K  $k$ : s<sup>-1</sup>)

| Temperature | $\Delta E_a^+$ | $\Delta E_a^-$ | $k_+$                 | $k_-$                  | $K(k_+/k_-)$          |
|-------------|----------------|----------------|-----------------------|------------------------|-----------------------|
| 250         | 29.38          | 155.77         | $3.76 \times 10^7$    | $9.26 \times 10^{-21}$ | $4.06 \times 10^{27}$ |
| 300         | 29.09          | 156.48         | $4.46 \times 10^8$    | $1.85 \times 10^{-15}$ | $2.41 \times 10^{23}$ |
| 350         | 28.81          | 157.25         | $2.60 \times 10^9$    | $1.11 \times 10^{-11}$ | $2.35 \times 10^{20}$ |
| 400         | 28.54          | 158.07         | $9.72 \times 10^9$    | $7.41 \times 10^{-9}$  | $1.31 \times 10^{18}$ |
| 450         | 28.29          | 158.94         | $2.69 \times 10^{10}$ | $1.15 \times 10^{-6}$  | $2.33 \times 10^{16}$ |
| 500         | 28.07          | 159.86         | $6.05 \times 10^{10}$ | $6.48 \times 10^{-5}$  | $9.34 \times 10^{14}$ |
| 550         | 27.87          | 160.82         | $1.17 \times 10^{11}$ | $1.73 \times 10^{-3}$  | $6.73 \times 10^{13}$ |
| 600         | 27.70          | 161.81         | $2.01 \times 10^{11}$ | $2.66 \times 10^{-2}$  | $7.53 \times 10^{12}$ |
| 650         | 27.56          | 162.83         | $3.16 \times 10^{11}$ | $2.67 \times 10^{-1}$  | $1.18 \times 10^{12}$ |
| 700         | 27.45          | 163.88         | $4.64 \times 10^{11}$ | $1.92 \times 10^0$     | $2.42 \times 10^{11}$ |
| 750         | 27.36          | 164.96         | $6.44 \times 10^{11}$ | $1.05 \times 10^1$     | $6.11 \times 10^{10}$ |
| 800         | 27.29          | 166.06         | $8.55 \times 10^{11}$ | $4.67 \times 10^1$     | $1.83 \times 10^{10}$ |
| 850         | 27.25          | 167.19         | $1.10 \times 10^{12}$ | $1.73 \times 10^2$     | $6.34 \times 10^9$    |
| 900         | 27.24          | 168.35         | $1.36 \times 10^{12}$ | $5.51 \times 10^2$     | $2.47 \times 10^9$    |
| 950         | 27.24          | 169.52         | $1.65 \times 10^{12}$ | $1.55 \times 10^3$     | $1.06 \times 10^9$    |
| 1000        | 27.27          | 170.72         | $1.95 \times 10^{12}$ | $3.93 \times 10^3$     | $4.96 \times 10^8$    |

**Table S18** The forward and inverse corrected activation energy barrier ( $\Delta E_a^+$  and  $\Delta E_a^-$ ) and equilibrium constants ( $k_+$ ,  $k_-$  and  $K$ ) for CO<sub>2</sub> on Fe<sub>8</sub>/Cu(100) surface at temperature from 250 to 1000 K. (Energy: kJ/mol Temperature: K  $k$ : s<sup>-1</sup>)

| Temperature | $\Delta E_a^+$ | $\Delta E_a^-$ | $k_+$                 | $k_-$                  | $K(k_+/k_-)$          |
|-------------|----------------|----------------|-----------------------|------------------------|-----------------------|
| 250         | 33.51          | 164.28         | $8.18 \times 10^6$    | $5.66 \times 10^{-23}$ | $1.44 \times 10^{29}$ |
| 300         | 33.04          | 165.43         | $1.45 \times 10^8$    | $1.88 \times 10^{-17}$ | $7.71 \times 10^{24}$ |
| 350         | 32.58          | 166.64         | $1.13 \times 10^9$    | $1.62 \times 10^{-13}$ | $6.98 \times 10^{21}$ |
| 400         | 32.13          | 167.91         | $5.22 \times 10^9$    | $1.42 \times 10^{-10}$ | $3.68 \times 10^{19}$ |
| 450         | 31.71          | 169.22         | $1.71 \times 10^{10}$ | $2.72 \times 10^{-8}$  | $6.28 \times 10^{17}$ |
| 500         | 31.32          | 170.58         | $4.38 \times 10^{10}$ | $1.81 \times 10^{-6}$  | $2.43 \times 10^{16}$ |
| 550         | 30.95          | 171.98         | $9.43 \times 10^{10}$ | $5.55 \times 10^{-5}$  | $1.70 \times 10^{15}$ |
| 600         | 30.60          | 173.41         | $1.78 \times 10^{11}$ | $9.57 \times 10^{-4}$  | $1.85 \times 10^{14}$ |
| 650         | 30.29          | 174.87         | $3.02 \times 10^{11}$ | $1.06 \times 10^{-2}$  | $2.85 \times 10^{13}$ |
| 700         | 29.99          | 176.36         | $4.73 \times 10^{11}$ | $8.27 \times 10^{-2}$  | $5.72 \times 10^{12}$ |
| 750         | 29.73          | 177.88         | $6.97 \times 10^{11}$ | $4.89 \times 10^{-1}$  | $1.42 \times 10^{12}$ |
| 800         | 29.49          | 179.42         | $9.73 \times 10^{11}$ | $2.31 \times 10^0$     | $4.22 \times 10^{11}$ |
| 850         | 29.27          | 180.98         | $1.30 \times 10^{12}$ | $9.04 \times 10^0$     | $1.44 \times 10^{11}$ |
| 900         | 29.07          | 182.56         | $1.68 \times 10^{12}$ | $3.03 \times 10^1$     | $5.55 \times 10^{10}$ |
| 950         | 28.89          | 184.17         | $2.11 \times 10^{12}$ | $8.94 \times 10^1$     | $2.36 \times 10^{10}$ |
| 1000        | 28.74          | 185.79         | $2.58 \times 10^{12}$ | $2.36 \times 10^2$     | $1.10 \times 10^{10}$ |

**Table S19** The forward and inverse corrected activation energy barrier ( $\Delta E_a^+$  and  $\Delta E_a^-$ ) and equilibrium constants ( $k_+$ ,  $k_-$  and  $K$ ) for CO<sub>2</sub> on Fe<sub>9</sub>/Cu(100) surface at temperature from 250 to 1000 K. (Energy: kJ/mol Temperature: K  $k$ : s<sup>-1</sup>)

| Temperature | $\Delta E_a^+$ | $\Delta E_a^-$ | $k_+$                 | $k_-$                  | $K(k_+/k_-)$          |
|-------------|----------------|----------------|-----------------------|------------------------|-----------------------|
| 250         | 26.44          | 159.14         | $6.28 \times 10^8$    | $8.53 \times 10^{-21}$ | $7.36 \times 10^{28}$ |
| 300         | 25.57          | 159.21         | $7.41 \times 10^9$    | $2.89 \times 10^{-15}$ | $2.57 \times 10^{24}$ |
| 350         | 24.71          | 159.35         | $4.30 \times 10^{10}$ | $2.51 \times 10^{-11}$ | $1.71 \times 10^{21}$ |
| 400         | 23.87          | 159.55         | $1.60 \times 10^{11}$ | $2.22 \times 10^{-8}$  | $7.20 \times 10^{18}$ |
| 450         | 23.05          | 159.79         | $4.42 \times 10^{11}$ | $4.30 \times 10^{-6}$  | $1.03 \times 10^{17}$ |
| 500         | 22.26          | 160.08         | $9.89 \times 10^{11}$ | $2.87 \times 10^{-4}$  | $3.45 \times 10^{15}$ |
| 550         | 21.50          | 160.41         | $1.90 \times 10^{12}$ | $8.85 \times 10^{-3}$  | $2.15 \times 10^{14}$ |
| 600         | 20.76          | 160.78         | $3.26 \times 10^{12}$ | $1.53 \times 10^{-1}$  | $2.13 \times 10^{13}$ |
| 650         | 20.05          | 161.17         | $5.13 \times 10^{12}$ | $1.70 \times 10^0$     | $3.02 \times 10^{12}$ |
| 700         | 19.37          | 161.60         | $7.52 \times 10^{12}$ | $1.33 \times 10^1$     | $5.66 \times 10^{11}$ |
| 750         | 18.71          | 162.05         | $1.04 \times 10^{13}$ | $7.87 \times 10^1$     | $1.33 \times 10^{11}$ |
| 800         | 18.07          | 162.52         | $1.38 \times 10^{13}$ | $3.72 \times 10^2$     | $3.72 \times 10^{10}$ |
| 850         | 17.46          | 163.02         | $1.77 \times 10^{13}$ | $1.46 \times 10^3$     | $1.21 \times 10^{10}$ |
| 900         | 16.87          | 163.54         | $2.20 \times 10^{13}$ | $4.90 \times 10^3$     | $4.49 \times 10^9$    |
| 950         | 16.30          | 164.09         | $2.66 \times 10^{13}$ | $1.44 \times 10^4$     | $1.84 \times 10^9$    |
| 1000        | 15.76          | 164.65         | $3.15 \times 10^{13}$ | $3.81 \times 10^4$     | $8.26 \times 10^8$    |
